## Characterization of the *Brassica napus* flavonol synthase gene family reveals bifunctional flavonol synthases

1 **Hanna Marie Schilbert<sup>1</sup>, Maximilian Schöne<sup>1</sup>, Thomas Baier<sup>2</sup>, Mareike Busche<sup>1</sup>, Prisca**  
2 **Viehöver<sup>1</sup>, Bernd Weisshaar<sup>1</sup>, and Daniela Holtgräwe<sup>1,\*</sup>**

3 <sup>1</sup>Genetics and Genomics of Plants, CeBiTec & Faculty of Biology, Bielefeld University, 33615  
4 Bielefeld, Germany; [hschilbe@cebitec.uni-bielefeld.de](mailto:hschilbe@cebitec.uni-bielefeld.de) (H.M.S.); [bernd.weisshaar@uni-bielefeld.de](mailto:bernd.weisshaar@uni-bielefeld.de)  
5 (B.W.); [dholtgra@cebitec.uni-bielefeld.de](mailto:dholtgra@cebitec.uni-bielefeld.de) (D.H.)

6 <sup>2</sup>Algaebiotechnology and Bioenergy, CeBiTec & Faculty of Biology, Bielefeld University, 33615  
7 Bielefeld, Germany

8 **\* Correspondence:**

9 Daniela Holtgräwe

10 [dholtgra@cebitec.uni-bielefeld.de](mailto:dholtgra@cebitec.uni-bielefeld.de)

11 **Keywords: flavonoid biosynthesis, specialized metabolism, rapeseed, 2-oxoglutarate-dependent**  
12 **dioxygenases, flavanone 3-hydroxylase, bifunctionality, gene family**

13

## 14 Abstract

15 Flavonol synthase (FLS) is a key enzyme for the formation of flavonols, which are a subclass of the  
16 flavonoids. FLS catalyses the conversion of dihydroflavonols to flavonols. The enzyme belongs to  
17 the 2-oxoglutarate-dependent dioxygenases (2-ODD) superfamily. We characterized the *FLS* gene  
18 family of *Brassica napus* that covers 13 genes, based on the genome sequence of the *B. napus*  
19 cultivar Express 617. The goal was to unravel which *BnaFLS* genes are relevant for seed flavonol  
20 accumulation in the amphidiploid species *B. napus*. Two *BnaFLS1* homeologs were identified and  
21 shown to encode bifunctional enzymes. Both exhibit FLS activity as well as flavanone 3-hydroxylase  
22 (F3H) activity, which was demonstrated *in vivo* and *in planta*. *BnaFLS1-1* and *-2* are capable of  
23 converting flavanones into dihydroflavonols and further into flavonols. Analysis of spatio-temporal  
24 transcription patterns revealed similar expression profiles of *BnaFLS1* genes. Both are mainly  
25 expressed in reproductive organs and co-expressed with the genes encoding early steps of flavonoid  
26 biosynthesis. Our results provide novel insights into flavonol biosynthesis in *B. napus* and contribute  
27 information for breeding targets with the aim to modify the flavonol content in rapeseed.

28

## 29 1 Introduction

30 Rapeseed (*Brassica napus* L.) is the second most important oil crop worldwide (Nesi et al., 2008;  
31 OECD-FAO and Connell, 2015). The high oil (~50%) and protein (~25%) content of *B. napus* seed is  
32 the result of decades of extensive breeding aiming to improve its nutritional quality and agronomical  
33 yield (Nesi et al., 2008). Still, the presence of anti-nutritional components, like phenolic compounds  
34 or glucosinolates, render rapeseed protein essentially unusable for human consumption (Wang et al.,  
35 2018; Hald et al., 2019). While glucosinolate break-down products cause metabolic disturbances,  
36 phenolics can impair digestibility and cause a strong bitter off-taste (Nesi et al., 2008; Wanasundara  
37 et al., 2016; Hald et al., 2019). The glucosinolates amount in seeds have been greatly reduced  
38 through breeding of double zero lines with improved nutraceutical properties (Nesi et al., 2008).  
39 However, breeding of low phenolic lines with optimal compositions for the use of rapeseed protein as  
40 edible vegetable product is difficult. The reason is the great diversity of phenolic compounds and  
41 their involvement in many processes which impact plant fitness (Auger et al., 2010; Wang et al.,  
42 2018). Phenolics can be beneficial for human health due to their antioxidant activity, thereby  
43 facilitating the prevention of cardiovascular diseases and cancer (Wang et al., 2018). On the other  
44 hand, phenolics can i) impair digestibility, ii) cause undesired dark color, and iii) cause bitter  
45 off-taste derived from kaempferol-derivatives (Auger et al., 2010; Hald et al., 2019). Therefore,  
46 breeding of low or high phenolic cultivars depends on their economic use, e.g. use as seed oil/animal  
47 feed or edible vegetable (Wang et al., 2018).

48 Flavonoids are a major group of phenolics and belong to a diverse class of plant specialized  
49 metabolites comprising over 9,000 different substances (Williams and Grayer, 2004; Grotewold,  
50 2006). They are derived from flavonoid biosynthesis (Figure 1), which branch off from the  
51 phenylalanine-based general phenylpropanoid pathway (Hahlbrock and Scheel, 1989). Flavonoids are  
52 classified in different subgroups, namely chalcones, flavones, flavandiols, anthocyanins,  
53 proanthocyanidins (PAs), aurones, and flavonols (Winkel-Shirley, 2001). Flavonols define the largest  
54 subgroup of flavonoids, mainly due to a plethora of glycosylation patterns (Zhang et al., 2013). They  
55 are classified in e.g. kaempferols and quercetins depending on the hydroxylation pattern of the B ring  
56 (Winkel-Shirley, 2001). Flavonols are colorless for the human eye but absorb in the ultraviolet (UV)  
57 range. After light treatment, they accumulate in their glycosylated form in the vacuole of epidermal

58 and mesophyll cells or on occasion in epicuticular waxes (Weisshaar and Jenkins, 1998; Winkel-  
59 Shirley, 2001; Agati et al., 2009). Their biosynthesis is largely influenced by environmental cues  
60 such as temperature and UV light (Winkel-Shirley, 2002; Olsen et al., 2009). Flavonols have several  
61 physiological functions in plants including antimicrobial properties, UV protection, modulation of  
62 auxin transport, male fertility, and flower pigmentation together with anthocyanins (Harborne and  
63 Williams, 2000; Peer and Murphy, 2007).

#### 64 **Figure 1: Simplified scheme of flavonoid biosynthesis.**

65 The flavonol biosynthesis pathway (highlighted via an orange arrow) is part of the flavonoid  
66 biosynthesis, which also includes the anthocyanin pathway (highlighted via a violet arrow) (modified  
67 after (Winkel-Shirley, 2001)). The metabolic flux into the flavonol biosynthesis is influenced by  
68 dihydroflavonol 4-reductase (DFR) as it competes with FLS for substrates. Enzyme names are  
69 abbreviated as follows: chalcone synthase (CHS), Chalcone isomerase (CHI), flavanone  
70 3-hydroxylase (F3H), flavonol synthase (FLS), UDP-glycosyltransferases (UGTs), anthocyanidin  
71 synthase (ANS).

72 The central enzyme of flavonol biosynthesis is flavonol synthase (FLS). FLS converts a  
73 dihydroflavonol into the corresponding flavonol by introducing a double bond between C-2 and C-3  
74 of the C-ring (Figure 1)(Forkmann et al., 1986; Holton et al., 1993). FLS activity was first identified  
75 in irradiated parsley cells (Britsch et al., 1981). Several studies identified more than one *FLS* gene in  
76 the genome of a given species, including *Zea mays* (Falcone Ferreyra et al., 2012), *Musa acuminata*  
77 (Busche et al., 2021), *Vitis vinifera* (Downey et al., 2003; Fujita et al., 2006), *Fressica hybrida* (Shan  
78 et al., 2020), and *Arabidopsis thaliana* (Pelletier et al., 1997; Owens et al., 2008). In *A. thaliana*,  
79 which is evolutionary closely related to *B. napus*, most genes of the central enzymes of the flavonoid  
80 biosynthesis are encoded by single-copy genes. However, *FLS* marks an exception as there are six  
81 genes annotated in the *A. thaliana* genome sequence (Pelletier et al., 1997; Owens et al., 2008). Only  
82 *FLS1* encodes a functional FLS, thus being the major contributor to flavonol production in  
83 *A. thaliana* (Wisman et al., 1998). It has been postulated that the *AthFLS* gene family derived from  
84 recent gene duplication events and is currently undergoing a pseudogenisation process to eliminate  
85 ‘unnecessary’ gene copies (Preuss et al., 2009; Stracke et al., 2009). The Brassicaceae-lineage  
86 specific whole genome triplication followed by diploidization after divergence from the common  
87 ancestor of *A. thaliana* and *B. napus* (Wang et al., 2011; Chalhoub et al., 2014) suggests that the  
88 amphidiploid *B. napus* harbours an even larger *FLS* family, which formally may cover up to 36  
89 members. So far, six *FLS* genes have been identified for the A-subgenome donor *B. rapa* (Guo et al.,  
90 2014), while the C-subgenome donor *B. oleracea* has not yet been studied in detail. Up to now, the  
91 exact size of the *B. napus* *FLS* gene family remains unknown. Previous studies on the flavonol  
92 biosynthesis in *B. napus* were mainly focused on metabolites (Auger et al., 2010) or covered  
93 transcriptomic and phylogenetic analysis of genes preceding the FLS reaction in the flavonol  
94 pathway (Qu et al., 2016).

95 Some FLSs have been characterized as bifunctional enzymes, exhibiting FLS and F3H activity  
96 (Figure 1), e.g. in *A. thaliana* (Prescott et al., 2002; Owens et al., 2008), *Oriza sativa* (Park et al.,  
97 2019), *Citrus unshiu* (Lukacin et al., 2003), and *Ginkgo biloba* (Xu et al., 2012). FLS has been  
98 classified as a 2-oxoglutarate-dependent dioxygenase (2-ODD), similar to flavanone 3-hydroxylase  
99 (F3H) and anthocyanidin synthase (ANS). The three enzymes display partial amino acid (aa)  
100 sequence similarity and overlapping functions (Prescott and John, 1996; Cheng et al., 2014). The  
101 nonheme cytosolic 2-ODD enzymes require 2-oxoglutarate as co-substrate, while ferrous iron acts as  
102 co-factor (Cheng et al., 2014). FLS and ANS are relatively closely related with 50-60% aa sequence  
103 similarity, while F3H share less than 35% similarity with FLS and ANS (Lukacin et al., 2003; Cheng

104 et al., 2014). ANS, an enzyme catalyzing a late step in the flavonoid biosynthesis pathway (Figure 1),  
105 can have both FLS and F3H activity (Welford et al., 2001; Cheng et al., 2014). Therefore, ANS  
106 contributes to flavonol production, although (at least in *A. thaliana*) to a much lesser extent than FLS  
107 (Preuss et al., 2009). In addition, 2-ODDs display species-specific substrate specificities and  
108 affinities (Preuss et al., 2009; Park et al., 2017; Jiang et al., 2020).

109 The transcriptional regulation of flavonol biosynthesis is mainly achieved by the combinatorial  
110 action(s) of MYB11, MYB12, and MYB111, which belong to subgroup 7 (SG7) of the R2R3-MYB  
111 transcription factor family (Mehrtens et al., 2005; Stracke et al., 2007). However, the  
112 *myb11/myb12/myb111* triple mutant of *A. thaliana* retains its pollen flavonol composition (Stracke et  
113 al., 2010). This led to the discovery of MYB99, MYB21, and MYB24, which together control  
114 flavonol biosynthesis in anthers and pollen (Battat et al., 2019; Shan et al., 2020). MYB21, MYB24,  
115 and the SG7 MYBs function as independent transcriptional activators (Mehrtens et al., 2005; Stracke  
116 et al., 2007; Shan et al., 2020). The SG7 MYBs can activate all genes belonging to flavonol  
117 biosynthesis including *CHS*, *CHI*, *F3H*, and *FLS* (Mehrtens et al., 2005; Stracke et al., 2007).  
118 Recently, direct activation of *AthFLS1* by *AthMYB21* and *AthMYB24* was shown in *A. thaliana*  
119 (Shan et al., 2020).

120 In this study, we characterize 13 members of the *BnaFLS* gene family, which is one of the largest  
121 FLS enzyme families analyzed to date. We separated the *BnaFLS* genes from *F3H* and *ANS* genes of  
122 *B. napus*. Only one *FLS* gene has been characterized so far in *B. napus* (Vu et al., 2015). We  
123 demonstrate that both *BnaFLS1* homeologs encode bifunctional enzymes, exhibiting FLS and F3H  
124 activity, while two *BnaFLS3* homeologs encode proteins with solely F3H activity. Moreover, we  
125 provide insights into the spatio-temporal transcription of *BnaFLSs* and present hypotheses about the  
126 mechanisms underlying FLS bifunctionality. Thus, our study provides novel insights into the  
127 flavonol biosynthesis of *B. napus* and supports targeted engineering of flavonol content, e.g. to  
128 enable the use of rapeseed protein in human consumption.

## 129 **2 Materials and Methods**

### 130 **2.1 Plant material**

131 We used the *B. napus* Express 617, a dark-seeded winter cultivar (Lee et al., 2020). *B. napus* was  
132 first grown in the greenhouse under long day conditions and then transferred outside for natural  
133 vernalisation, followed by additional growth outside. *A. thaliana* Columbia 0 (Col-0, NASC ID  
134 N1092) and Nössen-0 (Nö-0, NASC ID N3081) were used as wildtype controls. The *f3h* mutant  
135 (*tt6-2*, GK-292E08, NASC ID N2105575, Col-0 background) (Appelhagen et al., 2014) and the  
136 *ans/fls1* double mutant (synonym *ldox/fls1-2*, *ldox*: SALK\_028793, NASC ID N2105579, Col-0  
137 background; *fls1-2*: RIKEN\_PST16145, Nö-0 background) (Stracke et al., 2009) were used for the  
138 generation of transgenic lines. *A. thaliana* plants were grown in the greenhouse under a  
139 16-h-light/8-h-dark cycle at 22 °C before transformation.

### 140 **2.2 Identification of *BnaFLS* candidate genes**

141 *BnaFLS* homologs were identified with KIPes v0.255 as described previously (Pucker et al., 2020).  
142 KIPes was run with a minimal BLAST hit similarity of 40% to reduce the number of fragmented  
143 peptides derived from possible mis-annotations. As bait, peptide sequences from the sequence  
144 collection of functional F3H, FLS, and ANS sequences described in KIPes were used. As subject  
145 species, the peptide sequence sets of several *Brassica* species were used (Supplementary Table S1).  
146 The alignment was constructed with MAFFT v.7 (Kato and Standley, 2013) and trimmed to

147 minimal alignment column occupancy of 10%. Next, a phylogenetic tree was built with FastTree  
148 v2.1.10 (Price et al., 2009) using 10,000 rounds of bootstrapping, including the bait sequences and  
149 2-ODD-like sequences from *A. thaliana* derived from Kawai *et al.* 2014 (Kawai et al., 2014)  
150 (Supplementary File S1). The phylogenetic tree was visualized with FigTree v1.4.3  
151 (<http://tree.bio.ed.ac.uk/software/figtree/>)(Supplementary Figure S1). Classification of BnaFLS  
152 candidates was generated based on the corresponding *A. thaliana* orthologs.

### 153 **2.3 Sequence-specific analyses of *BnaFLS* candidates and secondary structure modelling**

154 A comprehensive summary about gene-specific features of *BnaFLS* candidates is summarized in  
155 Supplementary Table S2. GSDS 2.0 (Hu et al., 2015) was used to generate gene structure plots.  
156 Literature knowledge was used to identify MYB-recognition elements (MRE) within 1 kbp upstream  
157 of the translational start site of *BnaFLS* candidates (Supplementary Figure S2). The conserved MRE  
158 consensus sequence 5'-AcCTACCa-3', identified as a SG7 recognition motif (Hartmann et al., 2005;  
159 Stracke et al., 2007) and the sequence motifs important for the binding of AthMYB21 (MYBPZM:  
160 5'-CCWACC-3') and AthMYB24 (MYBCORE: 5'-CNGTTR-3') to *AthFLS1* were used for  
161 screening (Battat et al., 2019; Shan et al., 2020).

162 Theoretical isoelectric points, as well as molecular weight values of the BnaFLS protein sequences  
163 were calculated with ExPASy V (Gasteiger et al., 2005)(Supplementary Table S3). In addition,  
164 SignalP v. 5.0 (Almagro Armenteros et al., 2019b) and TargetP v. 2.0 (Almagro Armenteros et al.,  
165 2019a) were used to infer the presence of signal peptides and N-terminal presequences of BnaFLS  
166 candidates, respectively (Supplementary Table S4, S5). TMHMM v. 2.0 (Krogh et al., 2001) was  
167 used to predict transmembrane regions within BnaFLS sequences (Supplementary Table S2). Finally,  
168 Plant-mPLOC v. 2.0 (Chou and Shen, 2010) was used to predict the subcellular localization of  
169 BnaFLS candidates (Supplementary Table S2). Amino acid sequence identities of BnaFLSs  
170 compared to FLS homologs of *A. thaliana*, *B. rapa*, and *B. oleracea* were calculated based on a  
171 MAFFT alignment (Supplementary Table S6; <https://github.com/hschilbert/BnaFLS>). Protein  
172 sequence alignments were visualised at <http://esprict.ibcp.fr/ESPrict/ESPrict/index.php> v. 3.0  
173 (Robert and Gouet, 2014) using the *AthFLS1* pdb file derived from Pucker *et al.* 2020 (Pucker et al.,  
174 2020). Functionally relevant amino acid residues and motifs for FLS and F3H activity were  
175 highlighted.

176 *In silico* secondary structure models of relevant BnaFLS candidates were generated via I-TASSER  
177 (Roy et al., 2010) and visualized with Chimera v. 1.13.1 (Pettersen et al., 2004). The *AthF3H* PDB  
178 file derived from Pucker *et al.* 2020 (Pucker et al., 2020) was used for visualisation. The generated  
179 PDB files of this work can be accessed via Supplementary File S2.

### 180 **2.4 Gene expression analysis: Ribonucleic acid extraction, library construction, and** 181 **sequencing**

182 Ribonucleic acid (RNA) samples were isolated from seeds and leaves using the NucleoSpin<sup>®</sup> RNA  
183 Plant kit (Macherey-Nagel, Düren, Germany) according to manufacturer's instructions. Seed samples  
184 of the *B. napus* cultivar Express 617 were collected 23 and 35 days after flowering (DAF), while  
185 leave samples were collected 35 DAF. Samples were collected in triplicates. The RNA quality was  
186 validated using NanoDrop and Agilent 2100 to confirm the purity, concentration, and integrity,  
187 respectively. Based on 1 µg of total RNA, sequencing libraries were constructed following the  
188 TruSeq v2 protocol. Three seed and leaf samples per genotype were processed. Single end  
189 sequencing of 82 nt was performed on an Illumina NextSeq 500 at the Sequencing Core Facility of  
190 the Center for Biotechnology (CeBiTec) at Bielefeld University.



## 191 **2.5 Gene expression analysis and co-expression analysis using *B. napus* RNA-Seq data**

192 Read quality was assessed by FastQC (Andrews, 2018), revealing reads of good quality reaching a  
193 phred score of 35 or above. Next, reads were mapped to the Express 617 reference genome sequence  
194 (Lee et al., 2020) using STAR v. 2.7.1a (Dobin et al., 2013). STAR was run in basic mode allowing  
195 maximal 5% mismatches per read length and using a minimum of 90% matches per read length.  
196 These read mappings were used to manually correct the functional annotation of the *BnaFLS*  
197 candidates (Supplementary File S3). The corresponding corrected annotation file was used for  
198 downstream analysis.

199 Beside the newly generated RNA-Seq data, publicly available RNA-Seq data sets were used and  
200 retrieved from the Sequence Read Archive (<https://www.ncbi.nlm.nih.gov/sra>) via fastq-dump v.  
201 2.9.6 (<https://github.com/ncbi/sra-tools>) to analyze the expression of the candidate genes across  
202 various organs (Supplementary Table S7). Kallisto v. 0.44 (Bray et al., 2016) was used with default  
203 parameters to quantify transcripts abundance. The heatmap was constructed with a customized  
204 python script (<https://github.com/hschilbert/BnaFLS>) using mean transcripts per millions (TPMs) per  
205 organ. Condition-independent co-expression analysis was performed to identify co-expressed genes  
206 using Spearman's correlation coefficient (<https://github.com/hschilbert/BnaFLS>) by incorporating  
207 696 RNA-Seq data sets (Supplementary Table S8). To filter for strong co-expression the Spearman's  
208 correlation coefficient threshold was set to 0.7 as suggested by Usadel *et al.* 2009 (Usadel et al.,  
209 2009).

## 210 **2.6 Functional annotation of *B. napus* Express 617 genes**

211 Genes were functionally annotated by transferring the *A. thaliana* Araport11 (Cheng et al., 2017)  
212 functional annotation to the *B. napus* Express 617 gene models. The annotation was used for the  
213 co-expression analysis. OrthoFinder v. 2.3.7 (Emms and Kelly, 2019) was applied using default  
214 parameters to identify orthogroups between the representative peptide sequences of Araport11 and  
215 the *B. napus* Express 617 peptide sequences as previously defined (Pucker et al., 2017). Remaining  
216 nonannotated genes were functionally annotated by using reciprocal best blast hits (RBHs) and best  
217 blast hits (BBHs) as described previously (Pucker et al., 2016)(Supplementary Table S9).

## 218 **2.7 Generation of *BnaFLSs* constructs**

219 All constructs generated in this work were produced via Gateway cloning technique according to  
220 manufacturer's instructions and verified by DNA sequencing (Supplementary Table S10). Total RNA  
221 from leaves and seeds of Express 617 was extracted as described above (see 2.4). Complementary  
222 DNA (cDNA) was synthesized with the ProtoScript<sup>TM</sup> Reverse Transcriptase kit (Invitrogen,  
223 Karlsruhe, Germany) using ~1 µg of total RNA and 1 µl of oligo (dT) and 1 µl of random-hexamer  
224 primers. cDNA fragments corresponding to the full-length ORFs of the candidate genes were then  
225 amplified via PCR with Q5<sup>®</sup> High-Fidelity Polymerase PCR kit (NEB, Frankfurt am Main,  
226 Germany) using gene-specific gateway primers (Supplementary Table S9). The sizes of the  
227 amplification products were analyzed by gel electrophoresis and visualized by ethidium bromide on a  
228 1% agarose gel. The amplicons were purified from the PCR reagent tube via the NucleoSpin<sup>®</sup> Gel  
229 and PCR Clean-up Kit (Macherey-Nagel, Düren, Germany).

230 The purified cDNA fragments corresponding to the full-length ORFs of the candidate genes were  
231 then recombined into *pDONR<sup>TM</sup>/Zeo* (Invitrogen, Karlsruhe, Germany) using the Gateway BP  
232 Clonase II Enzyme Mix (Invitrogen, Karlsruhe, Germany) and the *attB* recombination sites of the  
233 respective gateway primers (Supplementary Table S10). Each entry clone was then used to transfer

234 the CDS into the destination vector *pLEELA* (Jakoby et al., 2004) or *pDEST17* (Invitrogen) via the  
235 Gateway LR Clonase II Enzyme Mix (Invitrogen, Karlsruhe, Germany). In *pLEELA*, the rapeseed  
236 coding sequences are under control of a double 35S promoter. *pDEST17* was used for heterologous  
237 protein expression during the *in vivo E. coli* bioconversion assay under the control of the T7  
238 promoter. The following constructs were available from previous studies: *pDEST17-AthF3H*,  
239 *pDEST17-AthFLS1* (Busche et al., 2021), *pDONR-AthFLS3*, *pDONR-AthFLS5*, *pDONR-AthANS*  
240 (Preuss et al., 2009). The respective *BnaFLS* CDS sequences are listed in Supplementary File S4.

## 241 **2.8 F3H and FLS bioconversion assay in *E. coli***

242 The bioconversion assay in *E. coli* subsequent HPTLC analysis of the methanolic extracts were  
243 performed as described in Busche *et al.* 2021 (Busche et al., 2021). Successful heterologous  
244 expression of the recombinant proteins via SDS-PAGE was shown (Supplementary Figure S3).

## 245 **2.9 Generation of complementation lines**

246 The generated *pLEELA-BnaFLSX* constructs were used to transform the *A. thaliana f3h* knock out  
247 mutant, as well as the *ans/fls1* double mutant using the *A. tumefaciens* strain GV3101::pM90RK  
248 (Konec and Schell, 1986) according to the floral dip protocol (Clough and Bent, 1998). Selection of  
249 T1 plants was carried out by BASTA selection. Surviving plants were genotyped for the respective  
250 wildtype and mutant alleles, as well as the insertion of the transgene into the genome and its  
251 expression via PCR and RT-PCR (Supplementary Table S10). The genotyping for the presence of the  
252 transgene was repeated with T2 plants. T2 plants were used for the generation of flavonol-containing  
253 methanolic extracts as described below (see 2.10). T2 plants of the transformed *ans/fls1* mutants and  
254 T3 plants of the transformed *f3h* mutants were used for DPBA-staining of young seedlings (see 2.11).

## 255 **2.10 Flavonol content analysis by high-performance thin-layer chromatography (HPTLC)**

256 The flavonol glycosides were extracted and analyzed as previously described (Stracke et al., 2009).  
257 *A. thaliana* stems were homogenised in 80% methanol and incubated for 15 min at 70 °C and then  
258 centrifuged for 10 min at 16,100 xg. The supernatants were vacuum-dried at 60 °C and sediments  
259 were dissolved in 1 µl of 80% methanol mg<sup>-1</sup> starting material for HPTLC analysis. In total, 3 µl of  
260 each sample were spotted on silica-60 HPTLC-plates. The *A. thaliana* accessions Col-0 and  
261 Nössen-0, as well as the *ans/fls1* double mutant were used as controls for the *ans/fls1 A. thaliana*  
262 complementation lines. For the *f3h* complementation lines, Col-0 and the *f3h* mutant were used as  
263 controls. The mobile phase consisted of a mixture of 66.7% ethyl acetate, 8% formic acid, 8% acetic  
264 acid, and 17.3% water. Flavonoid compounds were detected as described before (Stracke et al.,  
265 2009).

## 266 **2.11 *In situ* flavonoid staining of whole seedlings**

267 The visualisation of flavonoids via DPBA-staining with whole seedlings was performed as described  
268 (Stracke et al., 2007), with the following minor adaptations: the bleached seedlings were stained to  
269 saturation in a freshly prepared aqueous solution of 0.25% (w/v) DPBA, 0.01% (v/v) Triton X-100,  
270 and 20% ethanol (v/v).

271

## 272 **3 Results**

### 273 **3.1 FLS family of *B. napus***

274 We identified a monophyletic group of 13 *BnaFLS* candidates through phylogenetic analysis using  
 275 F3H, ANS, and 2-ODD-like protein sequences as outgroup to classify members of the 2-ODD family  
 276 (Figure 2, Supplementary Figure S1, Supplementary Table S2) of *B. napus*. The *BnaFLS* candidates  
 277 were further classified within the *FLS* gene family based on their phylogenetic relationship to their  
 278 most likely *A. thaliana* orthologs (Figure 2). Thereby, we identified two *BnaFLS1*, two *BnaFLS2*,  
 279 five *BnaFLS3*, and four *BnaFLS4* candidates in the *B. napus* cultivar Express 617. *BnaFLS1-1* was  
 280 identified on chromosome C09, while its homeolog *BnaFLS1-2* is located on chromosome A09.

281 **Figure 2: Phylogeny of *BnaFLS* candidates and previously described *FLS* sequences.**

282 Relative bootstrap-values are shown next to relevant nodes. The phylogenetic tree is based on amino  
 283 acid sequences. *FLS* family members of *B. napus* Express 617 are marked with an asterisk. The  
 284 outgroup comprises the 2-ODD members ANS and F3H, as well as 2-ODD-like sequences  
 285 (Supplementary Figure S1).

286 The genomic structure of the *BnaFLS* candidate genes comprises 3-4 exons and the encoded proteins  
 287 display a length range from 270 to 336 amino acids (aa) (Table 1, Supplementary Figure S4,  
 288 Supplementary Table S2). Considering the chromosomal rearrangements as described for the cultivar  
 289 Darmor-bzh (Chalhoub et al., 2014), homeologs were identified (Table 1).

290 **Table 1: Chromosomal location of *BnaFLS* candidate genes in Express 617.** The genomic  
 291 position and exon number per *BnaFLS* candidate gene based on the *B. napus* Express 617 assembly  
 292 are listed. Moreover, the amino acid (AA) length of the corresponding protein is stated. Homeologs  
 293 are located inside one row.

| Gene name        | Chromosome | Position [kbp]  | No. of exons | AA length |
|------------------|------------|-----------------|--------------|-----------|
| <i>BnaFLS1-1</i> | C09        | 57,490 - 57,492 | 3            | 336       |
| <i>BnaFLS1-2</i> | A10        | 18,238 - 18,240 | 3            | 336       |
| <i>BnaFLS2-1</i> | C03        | 45,458 - 45,461 | 3            | 307       |
| <i>BnaFLS2-2</i> | A06        | 21,674 - 21,677 | 3            | 307       |
| <i>BnaFLS3-1</i> | C03        | 45,437 - 45,438 | 4            | 270       |
| <i>BnaFLS3-2</i> | A06        | 21,693 - 21,694 | 3            | 297       |
| <i>BnaFLS3-3</i> | C02        | 49,747 - 49,749 | 3            | 309       |
| <i>BnaFLS3-4</i> | C02        | 49,966 - 49,969 | 3            | 309       |
| <i>BnaFLS3-5</i> | C02        | 49,972 - 49,974 | 3            | 310       |
| <i>BnaFLS4-1</i> | C09        | 5,509 - 5,511   | 3            | 320       |
| <i>BnaFLS4-2</i> | A09*       | 8 - 11          | 3            | 306       |
| <i>BnaFLS4-3</i> | C08        | 33,122 - 33,123 | 3            | 305       |
| <i>BnaFLS4-4</i> | A06        | 10,416 - 10,417 | 3            | 305       |

294 \*unanchored but assigned.

295 No *FLS5* and *FLS6* homologs were identified in *B. rapa*, *B. oleracea*, and *B. napus* (Figure 2).  
 296 Additionally screened *B. napus* cultivars (Gangan, No2127, Quinta, Shenglii, Tapidor, Westar, ZS11,  
 297 Zheyou7) were in line with these results. As a *FLS6* homolog is present in *Raphanus sativus*, a very  
 298 close relative to *B. rapa*, *B. oleracea* and *B. napus*, the latter three might have lost *FLS6* very  
 299 recently. *FLS5* was not found in the analyzed species of Brassiceae, Arabideae, Eutremeae, and  
 300 Coluteocarpeae, while at least one copy was present in Camelinae and Boechereae indicating that  
 301 *FLS5* might have recently emerged in the latter tribes.

302 **3.2 Organ- and temporal-specific expression of *BnaFLS* candidates**



303 The expression of all *BnaFLS* candidate genes was analyzed by newly generated and publicly  
 304 available RNA-Seq data (Table 2, Supplementary Table S7). As seeds are the major organ for  
 305 agronomical relevance, we screened for *BnaFLS* candidates expressed in seeds. In total, five genes  
 306 were found to be expressed in seeds: *BnaFLS1-1*, *BnaFLS1-2*, *BnaFLS2-1*, *BnaFLS3-3*, and  
 307 *BnaFLS3-4*. These five *BnaFLS* candidate genes revealed organ- and seed developmental-specific  
 308 expression patterns (Table 2).

309 **Table 2: Organ-specific expression of *BnaFLS* candidate genes.** The mean transcripts per millions  
 310 (TPMs) for each *BnaFLS* candidate gene per organ is listed. Single-end RNA-Seq data generated in  
 311 this study derived from leaves (35 DAF) and seeds (23 and 35 DAF) of Express 617 are marked with  
 312 an asterisk. The remaining organs are based on publicly available paired-end *B. napus* RNA-Seq data  
 313 sets. The number of analyzed data sets per organ is stated via (n=X). The color gradient from white  
 314 via light blue to dark blue indicates the expression strength with dark blue symbolizing high  
 315 expression. Abbreviations: days after flowering (DAF), days after pollination (DAP), shoot apical  
 316 meristem (SAM).

|                          | <i>BnaFLS1-1</i> | <i>BnaFLS1-2</i> | <i>BnaFLS2-1</i> | <i>BnaFLS2-2</i> | <i>BnaFLS3-1</i> | <i>BnaFLS3-2</i> | <i>BnaFLS3-3</i> | <i>BnaFLS3-4</i> | <i>BnaFLS3-5</i> | <i>BnaFLS4-1</i> | <i>BnaFLS4-2</i> | <i>BnaFLS4-3</i> | <i>BnaFLS4-4</i> |
|--------------------------|------------------|------------------|------------------|------------------|------------------|------------------|------------------|------------------|------------------|------------------|------------------|------------------|------------------|
| SAM (n=16)               | 2                | 3                | 0                | 0                | 0                | 1                | 27               | 0                | 0                | 1                | 0                | 2                | 1                |
| anther prophase 1 (n=12) | 14               | 3                | 0                | 0                | 0                | 0                | 1                | 3                | 0                | 0                | 0                | 0                | 0                |
| anther bolting (n=6)     | 227              | 248              | 2                | 0                | 0                | 0                | 6                | 0                | 0                | 0                | 1                | 6                | 2                |
| anther flowering (n=4)   | 148              | 131              | 0                | 0                | 3                | 0                | 13               | 4                | 0                | 0                | 0                | 4                | 1                |
| stamen (n=1)             | 6                | 7                | 0                | 0                | 0                | 12               | 12               | 0                | 0                | 0                | 0                | 0                | 0                |
| ovule (n=1)              | 7                | 1                | 1                | 0                | 0                | 0                | 53               | 3                | 0                | 0                | 1                | 1                | 0                |
| pistil (n=3)             | 20               | 33               | 1                | 1                | 0                | 2                | 16               | 0                | 0                | 0                | 0                | 1                | 0                |
| sepal (n=1)              | 12               | 10               | 0                | 0                | 0                | 0                | 5                | 0                | 0                | 0                | 3                | 8                | 5                |
| petal (n=2)              | 132              | 150              | 0                | 0                | 0                | 1                | 8                | 2                | 0                | 0                | 0                | 0                | 0                |
| silique 10-20DAF (n=13)  | 6                | 10               | 6                | 0                | 0                | 1                | 22               | 6                | 0                | 0                | 0                | 2                | 1                |
| silique 25DAF (n=6)      | 7                | 8                | 5                | 1                | 0                | 0                | 29               | 43               | 0                | 0                | 0                | 1                | 0                |
| silique 30DAF (n=6)      | 21               | 20               | 3                | 1                | 0                | 0                | 16               | 29               | 0                | 0                | 0                | 0                | 0                |
| silique 40DAF (n=2)      | 20               | 57               | 1                | 0                | 0                | 0                | 3                | 10               | 0                | 0                | 0                | 0                | 0                |
| seed 23DAF* (n=3)        | 15               | 4                | 1                | 0                | 0                | 0                | 55               | 76               | 0                | 0                | 0                | 1                | 1                |
| seed 35DAF* (n=3)        | 59               | 29               | 0                | 0                | 0                | 0                | 14               | 29               | 0                | 0                | 0                | 0                | 0                |
| seed coat 14DAF (n=7)    | 14               | 20               | 4                | 0                | 0                | 0                | 82               | 8                | 0                | 1                | 0                | 1                | 0                |
| seed coat 21DAF (n=6)    | 39               | 32               | 12               | 0                | 0                | 0                | 53               | 165              | 1                | 0                | 0                | 3                | 1                |
| seed coat 28DAF (n=6)    | 25               | 20               | 10               | 0                | 0                | 0                | 11               | 146              | 0                | 1                | 0                | 2                | 1                |
| seed coat 35DAF (n=6)    | 15               | 10               | 11               | 0                | 0                | 0                | 14               | 210              | 0                | 3                | 0                | 3                | 1                |
| seed coat 42DAF (n=6)    | 10               | 3                | 16               | 0                | 1                | 0                | 24               | 134              | 0                | 4                | 0                | 2                | 1                |
| embryo (n=6)             | 7                | 60               | 0                | 0                | 0                | 0                | 12               | 2                | 0                | 0                | 0                | 0                | 0                |
| endosperm (n=8)          | 7                | 3                | 1                | 0                | 0                | 1                | 8                | 66               | 0                | 3                | 2                | 0                | 0                |
| seedling (n=9)           | 5                | 6                | 1                | 0                | 1                | 9                | 25               | 1                | 0                | 0                | 1                | 11               | 2                |

|                      |    |    |    |    |    |    |     |    |    |   |   |    |    |
|----------------------|----|----|----|----|----|----|-----|----|----|---|---|----|----|
| leaf 35DAF* (n=3)    | 15 | 9  | 0  | 0  | 0  | 0  | 38  | 1  | 0  | 0 | 1 | 0  | 0  |
| stem (n=19)          | 9  | 10 | 4  | 4  | 1  | 1  | 40  | 7  | 0  | 0 | 0 | 6  | 2  |
| shoot (n=2)          | 6  | 10 | 0  | 0  | 0  | 0  | 23  | 0  | 0  | 0 | 0 | 0  | 0  |
| shoot apexes (n=2)   | 6  | 5  | 1  | 1  | 0  | 0  | 16  | 12 | 0  | 1 | 0 | 5  | 1  |
| root seedling (n=13) | 0  | 0  | 12 | 3  | 6  | 63 | 36  | 20 | 7  | 2 | 6 | 10 | 4  |
| root 30DAP (n=20)    | 0  | 0  | 7  | 5  | 7  | 38 | 22  | 8  | 4  | 1 | 1 | 34 | 31 |
| root 60DAP (n=2)     | 0  | 0  | 21 | 10 | 22 | 50 | 107 | 45 | 19 | 1 | 1 | 90 | 59 |

317 Both *BnaFLS1* candidates revealed similar expression patterns, showing the highest expression in late  
 318 anther development, petals, and seeds. The expression of both *BnaFLS1s* tend to increase in siliques  
 319 from 10 to 40 days after flowering (DAF). A similar expression pattern was observed in the seed coat  
 320 revealing a development dependent expression. The biggest differences in *BnaFLS1-1* and  
 321 *BnaFLS1-2* expression were observed in the embryo, where *BnaFLS1-2* is higher expressed  
 322 compared to *BnaFLS1-1* indicating organ-specific transcriptional regulation at least for this organ. In  
 323 contrast to *BnaFLS1s*, both *BnaFLS3s* are only marginally expressed in anthers and petals. While the  
 324 expression of *BnaFLS1s* peaks during late seed and silique development, the expression of both  
 325 *BnaFLS3s* peak in the early developmental stages. *BnaFLS3-4* is highly expressed during seed coat  
 326 development. Contrasting expression patterns of *BnaFLS3-3* and *BnaFLS3-4* were identified in e.g.  
 327 seed coat samples indicating again organ-specific transcriptional regulation. *BnaFLS2-1* was only  
 328 marginally expressed in all analyzed organs, showing the highest expression in seed coat and roots.  
 329 In summary, these findings indicate a role of *BnaFLS1-1*, *BnaFLS1-2*, *BnaFLS2-1*, *BnaFLS3-3*, and  
 330 *BnaFLS3-4* in seeds.

331 The five *BnaFLS* candidates expressed in seeds were used for downstream in-depth sequence- and  
 332 functional analysis of the encoded proteins. The candidates revealed similar genomic structures and  
 333 an alternative splice variant of *BnaFLS2-1* was detected (Figure 3, Supplementary Table S2,  
 334 Supplementary Figure S5).

### 335 **Figure 3: Genomic structure of *BnaFLS* candidates expressed in seeds.**

336 The exon-intron structure of *BnaFLS* candidates is shown. The exons are split into coding sequences  
 337 (CDS, black) and untranslated regions (UTR, gray) and are displayed by rectangles, introns are  
 338 displayed as black connecting lines.

### 339 **3.3 *BnaFLS1-1* and *BnaFLS1-2* are co-expressed with major players of the flavonoid** 340 **biosynthesis**

341 To get first insights into which biological pathways the five *BnaFLS* candidates expressed in seeds  
 342 might be involved, we identified co-expressed genes (Supplementary Table S11, S12, S13, S14,  
 343 S15). Interestingly, the genes with the most similar expression pattern to *BnaFLS1-1* are part of the  
 344 flavonoid biosynthesis or the general phenylpropanoid pathway, including *4CL*, *CHS*, *CHI*, *F3H*,  
 345 *F3'H*, *FLS1-2*, *UGT84A2*, *GSTF12*, and *MYB111*. Similar results were obtained for *BnaFLS1-2*,  
 346 which is co-expressed with homolog(s) of *4CL*, *CHS*, *CHI*, *F3H*, *FLS1-1*, *UGT84A2*, and *MYB111*.  
 347 Both *BnaFLS1* genes contain the conserved subgroup 7 MYB-recognition element (MRE) motif in  
 348 their putative promotor sequences (Supplementary Figure S2).

349 *BnaFLS3-4* was identified to be co-expressed with genes which mostly lack a functional annotation.  
 350 However, *BnaFLS3-4* is strongly co-expressed with a *MYB61* homolog. *AthMYB61* is a known  
 351 regulator of seed coat development. For *BnaFLS2-1* (Spearman's correlation coefficient < 0.59) and  
 352 *BnaFLS3-3* (Spearman's correlation coefficient < 0.69) no genes with strong co-expression could be

353 identified. This is likely due to the very weak expression of *BnaFLS2-1* and the broad expression  
 354 pattern of *BnaFLS3-3* (Table 2).

355 **3.4 BnaFLS candidates share high amino acid sequence identity to *A. thaliana* 2-ODD**  
 356 **orthologs**

357 To shed light on the potential functionalities of the *BnaFLS* candidates, the encoded proteins were  
 358 compared to the well-characterized 2-ODD-members FLS, F3H, and ANS from *A. thaliana* (Table  
 359 3). BnaFLS1-1 and BnaFLS1-2 share >91% sequence identity to AthFLS1, while BnaFLS2-1 has  
 360 57.4% sequence identity to AthFLS2. BnaFLS3-2 and BnaFLS3-3 revealed a sequence identity of  
 361 66.8% to AthFLS3. When comparing all BnaFLS candidates to AthF3H and AthANS, the protein  
 362 identity ranged from 26.7-31% and 33.6-38.4%, respectively. The two BnaFLS1 candidates share  
 363 98.2% sequence identity, differing in 6 aa positions, while both BnaFLS3 candidates have 97.4%  
 364 sequence identity, differing in 8 aa positions. The high sequence similarity between the BnaFLS  
 365 candidates and their respective AthFLS orthologs implies close structural relationships and related  
 366 functions.

367 **Table 3: Sequence identity of BnaFLS candidates and 2-ODD members of *A. thaliana*.** The  
 368 protein sequence identity between the BnaFLS candidates and 2-ODD members of *A. thaliana* is  
 369 given. The heatmap ranging from white via light blue to dark blue indicates low and high sequence  
 370 identity between the protein pair, respectively. Values are given in percentage.

|           | Ath<br>FLS1 | Ath<br>FLS2 | Ath<br>FLS3 | Ath<br>F3H | Bna<br>FLS1-1 | Bna<br>FLS1-2 | Bna<br>FLS2-1 | Bna<br>FLS3-3 | Bna<br>FLS3-4 | Ath<br>ANS |
|-----------|-------------|-------------|-------------|------------|---------------|---------------|---------------|---------------|---------------|------------|
| AthFLS1   | 100         | 46.4        | 64.1        | 29.8       | 91.1          | 91.4          | 57.7          | 57.3          | 56.7          | 39.9       |
| AthFLS2   |             | 100         | 47.3        | 22.0       | 46.7          | 46.7          | 57.4          | 45.7          | 45.6          | 27.0       |
| AthFLS3   |             |             | 100         | 27.3       | 62.9          | 62.6          | 59.7          | 66.8          | 66.8          | 34.5       |
| AthF3H    |             |             |             | 100        | 31.0          | 30.3          | 27.0          | 27.2          | 26.7          | 30.0       |
| BnaFLS1-1 |             |             |             |            | 100           | 98.2          | 56.6          | 56.1          | 55.8          | 38.4       |
| BnaFLS1-2 |             |             |             |            |               | 100           | 56.6          | 55.8          | 55.5          | 38.4       |
| BnaFLS2-1 |             |             |             |            |               |               | 100           | 54.3          | 53.7          | 34.1       |
| BnaFLS3-3 |             |             |             |            |               |               |               | 100           | 97.4          | 33.7       |
| BnaFLS3-4 |             |             |             |            |               |               |               |               | 100           | 33.6       |
| AthANS    |             |             |             |            |               |               |               |               |               | 100        |

371 **3.5 BnaFLS candidates carry residues important for FLS and F3H activity**

372 The five BnaFLS candidates expressed in seeds were analyzed with respect to conserved amino acids  
 373 and motifs important for FLS functionality (Figure 4). Both BnaFLS1 candidates contain all  
 374 conserved amino acids and motifs. All remaining candidates lack the motifs potentially important for  
 375 FLS activity, namely 'SxxTxLVP'-, 'CPQ/RPxLAL'-, and the N-terminal 'PxxxIRxxxEQP', in parts  
 376 or completely. However, all BnaFLS candidates possess the conserved residues for ferrous iron- and  
 377 2-oxoglutarate- binding. Only BnaFLS2-1 revealed three amino acid exchanges in the five substrate  
 378 binding residues analyzed, which are H103N, K173R, and E266D. BnaFLS3-3 and BnaFLS3-4 carry  
 379 a G235A (G261 in AthFLS1) amino acid exchange. As some FLSs are bifunctional showing  
 380 F3H-side activity, BnaFLS candidates were additionally screened for residues important for F3H  
 381 activity (Figure 4). Besides the previously described G235A exchange of both BnaFLS3 candidates,  
 382 all five BnaFLS candidates possess the residues described to play a role for F3H activity. The high

383 conservation of relevant motifs and amino acids suggested both FLS1 candidates to be bifunctional.  
384 Due to the incomplete motifs and exchanges in conserved amino acids of BnaFLS3-3, BnaFLS3-4,  
385 and BnaFLS2-1 the FLS and/or F3H activity of these candidates might be affected.

386 **Figure 4: Multiple sequence alignment of BnaFLS candidates relevant for seed flavonol**  
387 **accumulation.** Conserved amino acids and motifs important for FLS functionality were labelled as  
388 followed: the 'PxxxIRxxxEQP', 'CPQ/RPxxLAL', and 'SxxTxLVP' motifs are shown in orange,  
389 while residues involved in substrate-, ferrous iron-, and 2-oxoglutarate-binding are marked in green,  
390 red, and blue, respectively. Residues important for proper folding and/or highly conserved across  
391 2-ODDs are labelled in violet. Residues relevant for F3H activity are marked with a black star. Black  
392 background indicates perfect conservation across all sequences. Secondary structure information is  
393 derived from an *in silico* model of AthFLS1 predicted by I-TASSER. acc = relative accessibility.

394 Moreover, all BnaFLS candidates were predicted to contain no transmembrane helices, signal  
395 peptides or N-terminal presequences (mitochondrial-, chloroplast-, thylakoid luminal transfer  
396 peptide) and are therefore assumed and predicted to be located in the cytoplasm (Supplementary  
397 Table S2, S4, S5).

### 398 **3.6 Functional characterization of BnaFLS candidates**

399 For the functional characterization of BnaFLS1-1, BnaFLS1-2, BnaFLS2-1, BnaFLS3-3, and  
400 BnaFLS3-4 *in vivo* bioconversion assays in *E. coli* as well as analysis of stably transformed  
401 *A. thaliana* knock out mutants were performed. The reproducibility of the bioconversion assay was  
402 ensured by showing that the observed functionalities of the well-known 2-ODD members AthFLS1,  
403 AthFLS3, AthFLS5, AthF3H, and AthANS match literature-based knowledge (Supplementary Figure  
404 S6). As expected, AthF3H showed clear F3H activity. In line with previous reports, AthFLS1 was  
405 identified as bifunctional possessing FLS activity and F3H side activity and AthANS showed FLS  
406 and F3H side activity. None of these activities could be detected for AthFLS5. Although AthFLS3  
407 was reported to have FLS activity under extended assay conditions in *E. coli*, we could not detect  
408 FLS or F3H activity.

#### 409 **3.6.1 BnaFLS1-1 and BnaFLS1-2 are bifunctional enzymes exhibiting F3H and FLS activity**

410 The predictions reported above were experimentally validated for BnaFLS1-1 and BnaFLS1-2, which  
411 were indeed bifunctional. Both enzymes can generate dihydrokaempferol and kaempferol (Figure  
412 5A-B). To validate bifunctionality *in planta*, flavonol glycosides of the *ans/fls1* *A. thaliana* double  
413 mutants transgenic for *BnaFLS1-1* and *BnaFLS1-2* were analyzed via HPTLC. In line with the  
414 bioconversion assay results, the *in planta* analysis revealed successful complementation of the  
415 *ans/fls1* *A. thaliana* double knock out mutant by *BnaFLS1-1* or *BnaFLS1-2*, restoring the *A. thaliana*  
416 wildtype phenotype (Figure 5C). Additionally, DPBA-staining of young seedlings was used to  
417 visualize flavonoid derivatives under UV illumination, including kaempferol (green) and quercetin  
418 derivatives (yellow, orange). This *in situ* validation revealed a restoration of the wildtype phenotype  
419 by *BnaFLS1-1* and *BnaFLS1-2* compared to the *f3h* and *ans/fls1* knock out mutants (Figure 5D-E).  
420 Collectively, these results showed that *BnaFLS1-1* and *BnaFLS1-2* encode bifunctional enzymes,  
421 which exhibit FLS and F3H activity.

#### 422 **Figure 5: BnaFLS1-1 and BnaFLS1-2 are bifunctional enzymes exhibiting F3H and FLS** 423 **activity.**

424 (A) and (B) Bioconversion assay results based on a HPTLC using extracts from *E. coli* expressing  
425 recombinant BnaFLS1-1 or BnaFLS1-2. The substrate of F3H naringenin, as well as the FLS

426 substrate dihydrokaempferol and the product kaempferol were used as standards. AthFLS1 served as  
427 positive control and AthFLS5 as negative control. In the last sample no Naringenin (NA) was  
428 supplemented. (C) HPTLC on silica gel-60 plates of methanolic extracts of stem of Col-0, Nö-0,  
429 *ans/fls1 A. thaliana* knock out mutant, and three independent T2 *ans/fls1 A. thaliana* knock out  
430 *BnaFLS1-1* and *BnaFLS1-2* complementation lines followed by DPBA staining, applied in this order.  
431 Pictures were taken under UV illumination. Kaempferol- and quercetin derivatives are green and  
432 orange respectively, while sinapate derivates are faint blue, dihydrokaempferol derivates are turquois,  
433 and chlorophylls appear red. The following flavonoid derivates are labeled: kaempferol-3-O-  
434 rhamnoside-7-O-rhamnoside (K-3R-7R), quercetin-3-O-rhamnoside-7-O-rhamnoside (Q-3R-7R),  
435 kaempferol-3-O-glucoside-7-O-rhamnoside (K-3G-7R), quercetin-3-O-glucoside-7-O-rhamnoside  
436 (Q-3G-7R), kaempferol-3-O-glucorhamnosid-7-O-rhamnoside (K-3[G-R]-7R), quercetin-3-O-  
437 glucorhamnosid-7-O-rhamnoside (Q-3[G-R]-7R), kaempferol-3-O-gentiobioside-7-O-rhamnoside  
438 (K-3[G-G]-7R), and quercetin-3-O-gentiobioside-7-O-rhamnoside (Q-3[G-G]-7R). (D) and (E)  
439 Flavonol staining in young seedlings of Col-0, Nö-0, *ans/fls1* double and *f3h* single *A. thaliana* knock  
440 out mutant, as well as representative pictures of three independent T2 *ans/fls1 A. thaliana* knock out  
441 *BnaFLS1-1* and *BnaFLS1-2* complementation lines and three independent T3 *f3h A. thaliana* knock  
442 out *BnaFLS1-1* and *BnaFLS1-2* complementation lines. Flavonols in norflurazon-bleached seedlings  
443 were stained with DPBA until saturation and imaged by epifluorescence microscopy. Orange color  
444 indicates the accumulation of quercetin derivates. Photos of representative seedlings are shown.

### 445 **3.6.2 BnaFLS family members with divergent enzyme functionalities**

446 Interestingly, only BnaFLS1-1 and BnaFLS1-2 revealed FLS activity out of the five *BnaFLS*  
447 candidates expressed in seeds. While neither F3H nor FLS activity could be detected for BnaFLS2-1  
448 (Supplementary Figure S7), both BnaFLS3 candidates showed F3H activity *in vivo* and *in planta*,  
449 thus they can convert naringenin to dihydroflavonols (Figure 6A-E). However, no FLS activity could  
450 be detected for both BnaFLS3s (Figure 6A-E). These findings validate the predictions based on the  
451 presence of almost all important residues for F3H activity for both BnaFLS3s, with G235A (G261 in  
452 AthFLS1) being the only exception (Figure 4).

### 453 **Figure 6: BnaFLS3-3 and BnaFLS3-4 exhibit F3H activity.**

454 See Figure 5 for detailed figure description. (A) Bioconversion assay results of BnaFLS3-3 and (B)  
455 BnaFLS3-4. (C) The following flavonoid derivates were additionally labeled:  
456 dihydroquercetin-deoxyhexoside (DHQ-DH), dihydrokaempferol-hexoside (DHK-H),  
457 dihydroquercetin-hexoside (DHQ-H), quercetin-3-O-rhamnoside-7-O-glucoside (Q-3R-7G). (D) and  
458 (E) Flavonol staining in young seedlings.

### 459 **3.7 Structural modelling revealed three major differences of the bifunctional enzymes** 460 **compared to monofunctional ones**

461 To investigate whether the bifunctionality of both BnaFLS1s compared to both BnaFLS3s, which  
462 showed only F3H activity, might be based on structural differences *in silico*, 3D models were  
463 generated (Figure 7A-F). The BnaFLS1s showed three major differences compared to both  
464 BnaFLS3s, which offer insights into the potential mechanisms of bifunctionality: i) Both BnaFLS3  
465 models revealed a shorter N-terminus compared to BnaFLS1s, resulting in the loss of the presumably  
466 FLS-specific 'PxxxIRxxxEQP'-motif and  $\alpha$ -helices (Figure 4, Figure 7). ii) The amino acid G261  
467 proposed to be involved in proper folding is only present in both BnaFLS1s, while BnaFLS3s carry  
468 an alanine at this position. This residue is located between the transition of a beta-sheet from the  
469 jellyroll core structure to an  $\alpha$ -helix. The hydrophobic side chain of alanine likely reduces the space  
470 in the catalytic center. iii) Both BnaFLS3s show only partial overlaps with the 'SxxTxLVP'- and



471 ‘CPQ/RP<sub>x</sub>LAL’-FLS-specific sequence motifs (Figure 4). However, these mismatches do not have a  
472 substantial effect on the overall secondary structure in these regions (Figure 7 E-F). Moreover, an  
473 extended N-terminus is not essential for F3H activity since it is absent in BnaFLS3-3 and BnaFLS3-4  
474 (Figure 7 D-F).

#### 475 **Figure 7: 3D secondary structure models of BnaFLS1s and BnaFLS3s.**

476 Homology models of (A) AthFLS1, (B) BnaFLS1-1, (C) BnaFLS1-2, (D) AthF3H, (E) BnaFLS3-3,  
477 and (F) BnaFLS3-4 modelled via I-TASSER are shown looking into the center of the jellyroll motif.  
478 Ferrous iron-coordinating residues are shown in red, 2-oxoglutarate binding residues are marked in  
479 cyan, and the corresponding position of G261 in AthFLS1 is shown in magenta. The N-terminus  
480 divergence between BnaFLS1s and BnaFLS3s is marked in yellow (corresponding to amino acids  
481 1-42 in AthFLS1). Orange regions compromise regions postulated to be specific for FLS.

## 482 **4 Discussion**

### 483 **4.1 Phylogeny of *BnaFLS* gene family members**

484 Although flavonols are of agronomical, ornamental, nutritional, and health importance, the major  
485 players of the flavonol biosynthesis in the oil and protein crop *B. napus* have not been investigated in  
486 great detail yet. So far, only one *FLS* gene was identified via transient expression in tobacco (Vu et  
487 al., 2015). However, as there are several members of the *BnaFLS* gene family expressed in seeds, it is  
488 necessary to characterize the encoding enzymes to infer which genes contribute to flavonol  
489 biosynthesis in *B. napus* seeds.

490 The members of the *BnaFLS* gene family are more closely related to each other than to any of the  
491 other 2-ODDs, which is in line with the results for the *AthFLS* gene family (Owens et al., 2008). In  
492 contrast to the *AthFLS* gene family, which is located on chromosome 5 in close proximity (Owens et  
493 al., 2008), the members of the *BnaFLS* gene family are distributed across seven chromosomes.  
494 Considering the chromosomal rearrangements described for *B. napus* cultivar Darmor-bzh (Chalhoub  
495 et al., 2014) and also the chromosomal positions of the *B. rapa* (Guo et al., 2014) and *B. oleracea*  
496 (Parkin et al., 2014) *FLS* genes, high local synteny of the *FLS* loci to those of *B. napus* Express 617  
497 was identified. This syntenic relation allowed the assignment of 6 homeologous pairs of the *B. napus*  
498 *FLS* gene family. The homeolog pair *BnaFLS3-3* and *BnaFLS3-4* is located on the  
499 pseudochromosome C02 and clusters together with one additional unassigned *BnaFLS3-5* homolog.  
500 The position of *BnaFLS3-4* and *BnaFLS3-5* on C02 in the Express 617 assembly likely derives from  
501 a mis-assembly as inferred by manual curation of the locus and the frequent assignment of the  
502 respective homologs to A02 in other long-read *B. napus* cultivar assemblies like westar and shengli  
503 (Song et al., 2020). Moreover, the respective *B. rapa* homologs *BraFLS3-4* (Bra029212) and  
504 *BraFLS3-5* (Bra029211) are located on A02. *BraFLS3-4* and *BraFLS3-5* are assumed to originate  
505 from duplication of the syntenic *AthFLS2* to *AthFLS5* tandem array. This duplication is part of the  
506 whole genome duplication (WGD), but only some genes of the array were retained in *B. rapa* (Guo et  
507 al., 2014). *BraFLS3-5* is assumed to be derived from a gene duplication event of *BraFLS3-4* (Guo et  
508 al., 2014), which is underlined by the close proximity of the two homologs *BnaFLS3-4* and  
509 *BnaFLS3-5* (only 2.9 kbp apart in the Express 617 assembly, see Table 1). Moreover, *BraFLS2-2*  
510 (Bra038647) and *BraFLS3-2* (Bra038648) are assumed to have emerged by WGD events as  
511 described before (Guo et al., 2014). A similar originating mechanism is assumed for *BolFLS2-1*  
512 (Bo3g103270) and *BolFLS3-1* (Bo3g103260) and thus for their respective homologs *BnaFLS3-1* and  
513 *BnaFLS2-1*. Therefore, these ancient duplication events shaped the *B. napus* *FLS* gene family.

514 In *A. thaliana* *FLS5* encodes a full-length protein, which contains amino acid exchanges important  
515 for hydrogen bonding of the substrate most likely resulting in a non-functional polypeptide (Owens et  
516 al., 2008; Preuss et al., 2009). In line with our results, no *FLS5* homolog was identified in *B. rapa*  
517 (Guo et al., 2014). However, we could also not detect *FLS5* in Brassiceae, Arabideae, Eutremeae, and  
518 Coluteocarpeae, but *FLS5* was detected in the Camelinae, which include *A. thaliana*, as well as in  
519 Boechereae. Thus, we postulate that *FLS5* emerged after the divergence of the common ancestor of  
520 the parental species of *B. napus* (*B. rapa* and *B. oleracea*) and *A. thaliana* rather than that it was  
521 frequently lost after the WGD events of the tandem array as postulated by Guo *et al.* 2014 (Guo et  
522 al., 2014).

523 *FLS6* was characterized as a pseudogene in *A. thaliana* (Owens et al., 2008; Stracke et al., 2009) and  
524 no *FLS6* homolog was identified in *B. rapa* (Guo et al., 2014). These findings are in line with our  
525 results showing that *FLS6* was lost very recently in *B. rapa* and *B. oleracea* and consequently is not  
526 present in *B. napus*, since *FLS6* is still present in *Raphanus sativus*. As *FLS6* was identified as  
527 pseudogene and *FLS5* is known to encode a non-functional protein in *A. thaliana* (Owens et al.,  
528 2008; Preuss et al., 2009; Stracke et al., 2009), the parental species *B. oleracea* and *B. rapa* have  
529 already eliminated these ‘unnecessary’ genes.

530 However, some *BnaFLS* genes are retained as they still encode functional proteins like *BnaFLS3-3*  
531 and *BnaFLS3-4*, which encode for proteins with F3H activity. Importantly, both BnaFLS3s show a  
532 higher sequence identity with functional FLSs compared to F3H homologs, although exhibiting only  
533 F3H activity. This fact provides clear evidence that a classification solely based on amino acid  
534 sequences is not sufficient to infer functionalities of FLS family members and very likely 2-ODDs in  
535 general.

#### 536 **4.2 The *BnaFLS* gene family contains two bifunctional FLSs**

537 Bifunctionality has so far not been reported for a FLS from *B. napus*. By using two independent  
538 methods, we demonstrated bifunctionality of the two BnaFLS1 homeologs, which exhibit F3H and  
539 FLS activity. Thus, BnaFLS1-1 and BnaFLS1-2 are responsible for flavonol production *in planta*.  
540 We hypothesize that the respective orthologs of *B. oleracea* (Bo9g174290) and *B. rapa* (Bra009358)  
541 are bifunctional enzymes as well (Supplementary Table S6). Moreover, two additional members of  
542 the *BnaFLS* gene family have been functionally characterized. Interestingly, BnaFLS3-3 and  
543 BnaFLS3-4 revealed only F3H activity, while no FLS activity was detected. By incorporating  
544 sequence and structural analyses of 3D secondary structure models of BnaFLS1s vs BnaFLS3s, we  
545 proposed a set of evolutionary events underlying the mechanisms of bifunctionality. Both BnaFLS3s  
546 lack several amino acids at the beginning of the N-terminus, which could cause the loss of FLS  
547 activity as it harbours the ‘PxxxIRxxxEQP’ motif. This motif was previously proposed to be  
548 important for FLS activity as it distinguishes FLS from 2-oxoglutarate-/FeII-dependent dioxygenases  
549 with other substrate specificities (Owens et al., 2008; Stracke et al., 2009). Additional support for the  
550 relevance of this N-terminal region is provided by an AthFLS1 protein lacking the first 21 amino  
551 acids which showed no FLS activity (Pelletier et al., 1999; Owens et al., 2008). Moreover, amino  
552 acid exchanges in the ‘CPQ/RPxLAL’- and ‘SxxTxLVP’-motif in both BnaFLS3s possibly impact  
553 FLS activity. In addition, both BnaFLS3s carry a G235A (G261 in AthFLS1) amino acid exchange in  
554 comparison to BnaFLS1s, which might be relevant for bifunctionality as this exchange reduced the  
555 activity of a mutated *Citrus unshiu* FLS by 90% (Wellmann et al., 2002). This glycine is conserved  
556 across 2-ODDs and is suggested to play a role in proper folding (Wellmann et al., 2002). In  
557 accordance, we identified the A235 of BnaFLS3s and G261 of BnaFLS1 located between the  
558 transition of a beta-sheet from the jellyroll core structure to an  $\alpha$ -helix, thereby the hydrophobic side

559 chain of the alanine might reduce the space in the catalytic center. We propose that FLS  
560 bifunctionality is likely influenced by a combination of the identified motifs and residues rather than  
561 a single causative change as observed before for other flavonoid enzymes (Gebhardt et al., 2007;  
562 Seitz et al., 2007). The impact of each motif or amino acid on FLS bifunctionality needs further  
563 investigations that go beyond this study. As these sequence differences of BnaFLS3s do not abolish  
564 F3H activity, we uncovered that a truncated N-terminus and G261 are not essential for F3H activity.  
565 This is of importance as G261 was reported to be important for F3H activity (Britsch et al., 1993)  
566 while it may only play a minor role in conservation of F3H activity.

567 In addition to the FLS activity of BnaFLS1s, the 2-ODD member ANS might be able to contribute to  
568 flavonol production, as AthANS exhibit FLS and F3H side activities *in vitro* (Turnbull et al., 2004).  
569 *In planta*, FLS is the major enzyme in flavonol production as AthANS was not able to fully substitute  
570 AthFLS1 *in vivo* which is visible in the flavonol deficient *fls1-2* mutant (Owens et al., 2008; Stracke  
571 et al., 2009).

572 *BnaFLS2-1* is most likely a pseudogene. Although *BnaFLS2-1* is still marginally expressed as shown  
573 by RNA-Seq data, it carries amino acid exchanges within 3/5 substrate binding residues in addition to  
574 a truncated N-terminus, which render the protein non-functional. In addition, an alternative transcript  
575 of *BnaFLS2-1* was discovered (Supplementary Figure S5) that leads to a frameshift and thus likely  
576 encodes a non-functional protein as well. In *A. thaliana*, a heterologous expressed mutated FLS  
577 carrying one of the identified amino acid exchanges, namely K202R (K173R in BnaFLS2-1) is  
578 described to possess only 12% of the wild type FLS activity (Chua et al., 2008). In accordance,  
579 *AthFLS2* encodes a most likely non-functional protein, which also harbors a truncated N-terminus  
580 (Owens et al., 2008). We assume that *BnaFLS2-1* might be derived from a gene duplication event,  
581 losing its original function over time due to a pseudogenisation process similar to that proposed for  
582 the *AthFLS* gene family members (Preuss et al., 2009; Stracke et al., 2009). The rather low  
583 expression of *BnaFLS2-1* across various organs supports this hypothesis.

#### 584 **4.3 *BnaFLS1s* are major players in flavonol biosynthesis in *B. napus* seeds**

585 The spatio-temporal patterns of flavonol accumulation in *B. napus* are characterized by the activity of  
586 multiple *BnaFLS* genes. Both *BnaFLS3s* are expressed in early seed development while *BnaFLS1s*  
587 are expressed during late seed development (Table 2). The similar expression patterns of both  
588 *BnaFLS1s* are expected because they are homeologs. Thus, their expression patterns in the parental  
589 species *B. rapa* and *B. oleraceae* were likely to be very similar as they fulfill similar functions. In  
590 line with these results, *BnaFLS1-1* and *BnaFLS1-2* share co-expressed genes of the flavonoid and  
591 phenylpropanoid pathway. Both *BnaFLS1s* are co-expressed with *MYB111*, a regulator of flavonol  
592 biosynthesis (Stracke et al., 2007) and contain SG7 MRE in their putative promoter regions.  
593 Additionally, genes important for flavonoid transport into the vacuole and anthocyanidin/flavonol  
594 glycosylation like *GSTF12* (TT19) and *UGT84A2* (Kitamura et al., 2004; Yonekura-Sakakibara et al.,  
595 2012) were identified to be co-expressed with *BnaFLS1s*. These results further support the role of  
596 BnaFLS1-1 and BnaFLS1-2 as major players of flavonol biosynthesis in *B. napus* seeds. Moreover,  
597 transcriptomic and functional analysis of *BnaFLS1s* indicate gene redundancy.

598 Both *BnaFLS1s* were mainly expressed in reproductive organs as observed for *AthFLS1* (Owens et  
599 al., 2008). *BnaFLS3-4* was identified to be co-expressed with the well-known transcription factors  
600 MYB61, MYB123, and MYB5 which play a role in flavonoid biosynthesis and seed coat  
601 development in *A. thaliana* (Penfield et al., 2001; Li et al., 2009; Xu et al., 2014). This indicates a  
602 likely conserved transcriptional regulation between these two closely related species and supports the

603 importance of flavonols during reproductive processes, e.g. pollen tube growth (Muhlemann et al.,  
604 2018).

605 In line with metabolomic studies showing that phenolic and flavonoid seed content maximized 35  
606 days after flowering (DAF) (Wang et al., 2018), the expression of *BnaFLS1s* was higher at 35 DAF  
607 compared to 23 DAF. In accordance, most kaempferol and quercetin derivatives reach their abundance  
608 peak at 35 DAF (Wang et al., 2018). Thus the expression pattern of *BnaFLS1s* fit well with the  
609 flavonol accumulation pattern of developing seeds, where flavonols contribute to seed quality (Wang  
610 et al., 2018).

611 Finally, the expression of *BnaFLSs* family members is not restricted to seeds. Some *BnaFLSs* were  
612 identified to be expressed in roots including *BnaFLS3-3* and *BnaFLS3-4* indicating a role of those  
613 *BnaFLS* family members in flavonoid biosynthesis in roots.

#### 614 **4.4 Future perspectives in engineering flavonol content in *B. napus***

615 Engineering and breeding of flavonol content is of agronomical, economical, and ornamental  
616 importance (Takahashi et al., 2007; Cook et al., 2013; Yin et al., 2019). Flavonol content in petals  
617 influences pollinator attraction and drives microevolution of pollinators (Sheehan et al., 2015;  
618 Grotewold, 2016). Moreover, flavonols possess ROS scavenging activities and provide protection  
619 against UV-B radiation (Harborne and Williams, 2000). Besides the potential of engineering flavonol  
620 biosynthesis, anthocyanin and proanthocyanidin production can be engineered as FLS and DFR  
621 compete for substrates (Figure 8), thereby influencing important agronomical traits e.g. seed color  
622 (Luo et al., 2016). This study identified two bifunctional *BnaFLS1s* which are highly expressed in  
623 seeds and can thus be harnessed to engineer the metabolic flux of seed flavonol biosynthesis in the  
624 future (Figure 8). For example, the main bitter off-taste component in rapeseed protein isolates is  
625 kaempferol 3-O-(2-O-Sinapoyl- $\beta$ -sophoroside) (Hald et al., 2019). Thus, the results of this study  
626 provide the basis for breeding low-phenolics lines with focus on the reduction of e.g. kaempferols in  
627 seeds, thereby supporting the use of rapeseed protein in human consumption.

#### 628 **Figure 8: Functional activities of the *B. napus* flavonol synthase family.**

629 *BnaFLS1-1* and *BnaFLS1-2* marked in dark blue, are bifunctional enzyme exhibiting F3H and FLS  
630 activity. *BnaFLS3-3* and *BnaFLS3-4* labelled in light blue possess F3H activity.

#### 631 **5 Data Availability Statement**

632 The RNA-Seq data sets generated for this study can be found in the ENA/NCBI BioProject  
633 PRJEB45399.

#### 634 **6 Conflict of Interest**

635 The authors declare that the research was conducted in the absence of any commercial or financial  
636 relationships that could be construed as a potential conflict of interest.

#### 637 **7 Author Contributions**

638 HMS, DH and BW conceived and designed research. HMS, MS, TB, MB and PV investigated and  
639 conducted experiments. HMS performed bioinformatic analyses and data curation. HMS wrote the  
640 initial draft manuscript. HMS, BW, DH, MB, and TB revised the manuscript.



## 641 **8 Funding**

642 This research was funded by the BMBF project RaPEQ, grant number 'FKZ 031B0888A'. We  
643 acknowledge support for the publication costs (APC) by the Open Access Publication Fund of  
644 Bielefeld University.

## 645 **9 Acknowledgments**

646 We are extremely grateful to all researchers who submitted their *B. napus* RNA-Seq data sets to the  
647 appropriate databases and published their experimental findings. We thank Ralf Stracke for critical  
648 proof-reading and discussion. Moreover, we are grateful to Andrea Voigt for excellent technical  
649 assistance. In addition, we thank Nele Tiemann for her help in constructing *BnaFLS1-2* plasmids. We  
650 thank Rod Snowdon and Huey Tyng Lee for their support and early excess to the *B. napus* Express  
651 617 reference genome sequence. We thank Christian Möllers for supporting us with viable seeds of  
652 Express 617. We thank the Sequencing Core Facility for doing an excellent job in determining DNA  
653 sequences. We thank the Center for Biotechnology (CeBiTec) at Bielefeld University for providing  
654 an environment to perform the computational analyses.

655

## 656 **10 Supplementary Material**

657 **Supplementary Table S1: Brassicaceae data sets used for phylogenetic analysis.**

658 **Supplementary Table S2: Gene-specific features of *BnaFLS* genes.**

659 **Supplementary Table S3: Theoretical isoelectric point and molecular weight of analyzed**  
660 **proteins.**

661 **Supplementary Table S4: TargetP-2.0 prediction results.**

662 **Supplementary Table S5: SignalP-5.0 prediction results.**

663 **Supplementary Table S6: Amino acid sequence identities of BnaFLSs compared to FLS**  
664 **orthologs of *A. thaliana*, *B. rapa*, and *B. oleracea*.**

665 **Supplementary Table S7: SRA data sets used for organ-specific RNA-Seq analysis.**

666 **Supplementary Table S8: SRA data sets used for condition-independent co-expression analysis.**

667 **Supplementary Table S9: Functional annotation used in this work.**

668 **Supplementary Table S10: Oligonucleotide primers used in this work.**

669 **Supplementary Table S11: Genes co-expressed with *BnaFLS1-1*.**

670 **Supplementary Table S12: Genes co-expressed with *BnaFLS1-2*.**

671 **Supplementary Table S13: Genes co-expressed with *BnaFLS2-1*.**

672 **Supplementary Table S14: Genes co-expressed with *BnaFLS3-3*.**



673 **Supplementary Table S15: Genes co-expressed with *BnaFLS3-4*.**

674

675 **Supplementary Figure S1: Phylogeny of BnaFLS candidates and other plant 2-ODDs.**

676 Relative bootstrap-values are shown next to relevant nodes. The phylogenetic tree is based on amino  
677 acid sequences of the 2-ODD members FLS, ANS, F3H, and 2-ODD-like sequences derived from  
678 Kawai *et al.* 2014.

679 **Supplementary Figure S2: MYB recognition elements of *BnaFLSs*.**

680 MYB recognition elements upstream of the transcriptional start site (black arrow) annotated based on  
681 newly generated RNA-Seq data of *BnaFLS* genes are shown. The SG7 consensus MRE  
682 (5'-AcCTACCa-3'/5'-tGGTAGgT-3') is marked in blue, while the MRE of MYB24  
683 (5'-CNGTTR-3'/5'-RAACNG-3') is shown in green. Bases differentiating from the consensus motif  
684 are underlined. The start codon is highlighted in yellow.

685 **Supplementary Figure S3: SDS-PAGE of recombinant proteins analyzed in this work.**

686 Recombinant proteins are marked with a red arrow. The *E. coli* strain BL21 was used as control.  
687 uninduced (-), induced (+).

688 **Supplementary Figure S4: Genomic structure of *BnaFLSs*.**

689 The exon-intron structure of *BnaFLSs* is shown. The exons are split into coding sequences (CDS,  
690 black) and untranslated regions (UTR, gray) and are displayed by rectangles, introns are displayed as  
691 black connecting lines.

692 **Supplementary Figure S5: Genomic structure of the alternative transcript of *BnaFLS2-1.2*.**

693 (A) The exon-intron structure of *BnaFLS2-1.1* and *BnaFLS2-1.2* is shown. The coding sequences  
694 (CDS, black), untranslated regions (UTR, gray), and introns are displayed by black and gray  
695 rectangles, as well as black connecting lines, respectively. The alternative transcript *BnaFLS2-1.2*  
696 contains an additional third exon of 173 bp rendering the encoded 253 amino acid protein most likely  
697 non-functional. (B) A frameshift causes a nonsense mutation in the additional third exon. This  
698 transcript was observed in seed samples (23 DAF and 35 DAF).

699 **Supplementary Figure S6: Bioconversion assays of *A. thaliana* 2-ODD members.**

700 (A) and (B) Bioconversion assay results based on a HPTLC using extracts from *E. coli* expressing  
701 recombinant AthFLS1 or AthFLS3, respectively. The substrate of F3H naringenin, as well as the FLS  
702 substrate dihydrokaempferol and the product kaempferol were used as standards. AthFLS1 served as  
703 positive control and AthFLS5 as negative control. In the last sample no Naringenin (NA) was  
704 supplemented. (C) Bioconversion assay results of AthF3H and AthFLS5. The *E. coli* strain BL21  
705 was used as control.

706 **Supplementary Figure S7: Functional characterization of BnaFLS2-1.**

707 See Figure 5 for detailed figure description. (A) Bioconversion assay results of BnaFLS2-1. (B) The  
708 following flavonoid derivatives were additionally labeled: dihydroquercetin-deoxyhexoside  
709 (DHQ-DH), dihydrokaempferol-hexoside (DHK-H), dihydroquercetin-hexoside (DHQ-H), quercetin-  
710 3-O-rhamnoside-7-O-glucoside (Q-3R-7G). (C) and (D) Flavonol staining in young seedlings.

711

712 **Supplementary File S1: List of plant 2-ODDs amino acid sequences used in phylogenetic**  
713 **analysis.**

714 **Supplementary File S2: 3D secondary structure models used in this work.**

715 **Supplementary File S3: Corrected structural annotation of *BnaFLS* genes.**

716 **Supplementary File S4: CDS of BnaFLSs from this work.**

717

## 718 **11 Contribution to the field statement**

719 Rapeseed is the second most important oil crop worldwide. The presence of anti-nutritional  
720 components renders rapeseed protein, which remains after oil extraction, unusable for human  
721 consumption. Flavonols are a major group of phenolics and contribute to the anti-nutritional  
722 components. Flavonol biosynthesis branches off from flavonoid biosynthesis. Previous studies in  
723 *B. napus* were mainly focused on metabolites, or cover analyses of enzymes/genes action in early  
724 steps of flavonoid biosynthesis, preceding flavonol synthase (FLS). In this work, we identified the  
725 members of the rapeseed *FLS* gene family and discuss the underlying evolutionary events that shaped  
726 the *FLS* gene family. The *FLS* gene family members were analyzed at genomic and transcriptomic  
727 level. As seeds are the major organ of agronomical importance, we focussed on *FLS* genes expressed  
728 in seeds. These candidates were functionally characterized using *in vivo* and *in planta* experiments.  
729 BnaFLS1-1 and BnaFLS1-2 were identified as bifunctional enzymes exhibiting FLS- and F3H  
730 activity. Potential mechanisms underlying bifunctionality are presented. Finally, the findings are  
731 discussed in the light of the flavonol biosynthesis in *B. napus* pointing towards future directions e.g.  
732 to support the use of rapeseed protein in human consumption.

## 733 **12 References**

- 734 Agati, G., Stefano, G., Biricolti, S., and Tattini, M. (2009). Mesophyll distribution of 'antioxidant'  
735 flavonoid glycosides in *Ligustrum vulgare* leaves under contrasting sunlight irradiance.  
736 *Annals of Botany* 104(5), 853-861.
- 737 Almagro Armenteros, J.J., Salvatore, M., Emanuelsson, O., Winther, O., von Heijne, G., Elofsson,  
738 A., et al. (2019a). Detecting sequence signals in targeting peptides using deep learning. *Life*  
739 *Science Alliance* 2(5), e201900429.
- 740 Almagro Armenteros, J.J., Tsirigos, K.D., Sonderby, C.K., Petersen, T.N., Winther, O., Brunak, S., et  
741 al. (2019b). SignalP 5.0 improves signal peptide predictions using deep neural networks.  
742 *Nature Biotechnology* 37(4), 420-423.
- 743 Andrews, S. (2018). *FastQC, a quality control tool for high throughput sequence data*. [Online].  
744 Available: <http://www.bioinformatics.babraham.ac.uk/projects/fastqc/> [Accessed 6 Oct 2018  
745 2018].
- 746 Appelhagen, I., Thiedig, K., Nordholt, N., Schmidt, N., Huep, G., Sagasser, M., et al. (2014). Update  
747 on *transparent testa* mutants from *Arabidopsis thaliana*: characterisation of new alleles from  
748 an isogenic collection. *Planta* 240(5), 955-970.
- 749 Auger, B., Marnet, N., Gautier, V., Maia-Grondard, A., Leprince, F., Renard, M., et al. (2010). A  
750 detailed survey of seed coat flavonoids in developing seeds of *Brassica napus* L. *Journal of*  
751 *Agricultural and Food Chemistry* 58(10), 6246-6256.

- 752 Battat, M., Eitan, A., Rogachev, I., Hanhineva, K., Fernie, A., Tohge, T., et al. (2019). A MYB Triad  
753 Controls Primary and Phenylpropanoid Metabolites for Pollen Coat Patterning. *Plant*  
754 *Physiology* 180(1), 87-108.
- 755 Bray, N.L., Pimentel, H., Melsted, P., and Pachter, L. (2016). Near-optimal probabilistic RNA-seq  
756 quantification. *Nature Biotechnology* 34(5), 525-527.
- 757 Britsch, L., Dedio, J., Saedler, H., and Forkmann, G. (1993). Molecular characterization of flavanone  
758 3 beta-hydroxylases. Consensus sequence, comparison with related enzymes and the role of  
759 conserved histidine residues. *European Journal of Biochemistry* 217(2), 745-754.
- 760 Britsch, L., Heller, W., and Grisebach, H. (1981). Conversion of flavanone to flavone,  
761 dihydroflavonol to flavonol with enzyme systems from cell cultures of parsley. *Zeitschrift fur*  
762 *Naturforschung. C, Journal of biosciences* 36(9-10), 742-750.
- 763 Busche, M., Acatay, C., Weisshaar, B., and Stracke, R. (2021). Functional characterisation of banana  
764 (*Musa* spp.) 2-oxoglutarate dependent dioxygenases involved in flavonoid biosynthesis.  
765 *bioRxiv* <https://doi.org/10.1101/2021.05.03.442406>, posted 2021-2005-2003.
- 766 Chalhoub, B., Denoeud, F., Liu, S., Parkin, I.A., Tang, H., Wang, X., et al. (2014). Early  
767 allopolyploid evolution in the post-neolithic *Brassica napus* oilseed genome. *Science*  
768 345(6199), 950-953.
- 769 Cheng, A.X., Han, X.J., Wu, Y.F., and Lou, H.X. (2014). The function and catalysis of 2-  
770 oxoglutarate-dependent oxygenases involved in plant flavonoid biosynthesis. *International*  
771 *Journal of Molecular Sciences* 15(1), 1080-1095.
- 772 Cheng, C.Y., Krishnakumar, V., Chan, A., Thibaud-Nissen, F., Schobel, S., and Town, C.D. (2017).  
773 Araport11: a complete reannotation of the *Arabidopsis thaliana* reference genome. *The Plant*  
774 *Journal* 89(4), 789-804.
- 775 Chou, K.C., and Shen, H.B. (2010). Plant-mPLOC: a top-down strategy to augment the power for  
776 predicting plant protein subcellular localization. *PLoS One* 5(6), e11335.
- 777 Chua, C.S., Biermann, D., Goo, K.S., and Sim, T.S. (2008). Elucidation of active site residues of  
778 *Arabidopsis thaliana* flavonol synthase provides a molecular platform for engineering  
779 flavonols. *Phytochemistry* 69(1), 66-75.
- 780 Clough, S.J., and Bent, A.F. (1998). Floral dip: a simplified method for *Agrobacterium*-mediated  
781 transformation of *Arabidopsis thaliana*. *The Plant Journal* 16(6), 735-743.
- 782 Cook, S.M., Skellern, M.P., Döring, T.F., and Pickett, J.A. (2013). Red oilseed rape? The potential  
783 for manipulation of petal colour in control strategies for the pollen beetle (*Meligethes*  
784 *aeneus*). *Arthropod-Plant Interactions* 7(3), 249-258.
- 785 Dobin, A., Davis, C.A., Schlesinger, F., Drenkow, J., Zaleski, C., Jha, S., et al. (2013). STAR:  
786 ultrafast universal RNA-seq aligner. *Bioinformatics* 29(1), 15-21.
- 787 Downey, M.O., Harvey, J.S., and Robinson, S.P. (2003). Synthesis of flavonols and expression of  
788 flavonol synthase genes in the developing grape berries of Shiraz and Chardonnay (*Vitis*  
789 *vinifera* L.). *Australian Journal of Grape and Wine Research* 9, 110-121.
- 790 Emms, D.M., and Kelly, S. (2019). OrthoFinder: phylogenetic orthology inference for comparative  
791 genomics. *Genome Biology* 20(1), 238.

- 792 Falcone Ferreyra, M.L., Casas, M.I., Questa, J.I., Herrera, A.L., Deblasio, S., Wang, J., et al. (2012).  
793 Evolution and expression of tandem duplicated maize flavonol synthase genes. *Frontiers in*  
794 *Plant Science* 3(101).
- 795 Forkmann, G., De Vlaming, P., Spribille, R., Wiering, H., and Schram, A.W. (1986). Genetic and  
796 biochemical studies on the conversion of dihydroflavonols to flavonols in flowers of *Petunia*  
797 *hybrida*. *Zeitschrift fur Naturforschung. C, Journal of biosciences* 41(1-2), 179-186.
- 798 Fujita, A., Goto-Yamamoto, N., Aramaki, I., and Hashizume, K. (2006). Organ-specific transcription  
799 of putative flavonol synthase genes of grapevine and effects of plant hormones and shading  
800 on flavonol biosynthesis in grape berry skins. *Bioscience, Biotechnology, and Biochemistry*  
801 70(3), 632-638.
- 802 Gasteiger, E., Hoogland, C., Gattiker, A., Duvaud, S.e., Wilkins, M.R., Appel, R.D., et al. (2005).  
803 "Protein Identification and Analysis Tools on the ExPASy Server," in *The Proteomics*  
804 *Protocols Handbook*, ed. W. J.M.), 571-607.
- 805 Gebhardt, Y.H., Witte, S., Steuber, H., Matern, U., and Martens, S. (2007). Evolution of flavone  
806 synthase I from parsley flavanone 3beta-hydroxylase by site-directed mutagenesis. *Plant*  
807 *Physiology* 144(3), 1442-1454.
- 808 Grotewold, E. (2006). *The Science of Flavonoids*. Columbus: The Ohio State University.
- 809 Grotewold, E. (2016). Flavonols drive plant microevolution. *Nature Genetics* 48(2), 112-113.
- 810 Guo, N., Cheng, F., Wu, J., Liu, B., Zheng, S., Liang, J., et al. (2014). Anthocyanin biosynthetic  
811 genes in *Brassica rapa*. *BMC Genomics* 15(426).
- 812 Hahlbrock, K., and Scheel, D. (1989). Physiology and molecular biology of phenylpropanoid  
813 metabolism. *Annual Review of Plant Physiology and Plant Molecular Biology* 40(1), 347-  
814 369.
- 815 Hald, C., Dawid, C., Tressel, R., and Hofmann, T. (2019). Kaempferol 3-O-(2"-O-sinapoyl-β-  
816 sophoroside) Causes the Undesired Bitter Taste of Canola/Rapeseed Protein Isolates. *Journal*  
817 *of Agricultural & Food Chemistry* 67(1), 372-378.
- 818 Harborne, J.B., and Williams, C.A. (2000). Advances in flavonoid research since 1992.  
819 *Phytochemistry* 55(6), 481-504.
- 820 Hartmann, U., Sagasser, M., Mehrrens, F., Stracke, R., and Weisshaar, B. (2005). Differential  
821 combinatorial interactions of cis-acting elements recognized by R2R3-MYB, BZIP, and  
822 BHLH factors control light-responsive and tissue-specific activation of phenylpropanoid  
823 biosynthesis genes. *Plant Molecular Biology* 57(2), 155-171.
- 824 Holton, T.A., Brugliera, F., and Tanaka, Y. (1993). Cloning and expression of flavonol synthase from  
825 *Petunia hybrida*. *The Plant Journal* 4, 1003-1010.
- 826 Hu, B., Jin, J., Guo, A.Y., Zhang, H., Luo, J., and Gao, G. (2015). GSDDS 2.0: an upgraded gene  
827 feature visualization server. *Bioinformatics* 31(8), 1296-1297.
- 828 Jakoby, M., Wang, H.Y., Reidt, W., Weisshaar, B., and Bauer, P. (2004). FRU (BHLH029) is  
829 required for induction of iron mobilization genes in *Arabidopsis thaliana*. *FEBS Letters*  
830 577(3), 528-534.
- 831 Jiang, X., Shi, Y., Fu, Z., Li, W.W., Lai, S., Wu, Y., et al. (2020). Functional characterization of  
832 three flavonol synthase genes from *Camellia sinensis*: Roles in flavonol accumulation. *Plant*  
833 *Science* 300, 110632.



- 834 Katoh, K., and Standley, D.M. (2013). MAFFT multiple sequence alignment software version 7:  
835 improvements in performance and usability. *Molecular Biology and Evolution* 30(4), 772-  
836 780.
- 837 Kawai, Y., Ono, E., and Mizutani, M. (2014). Evolution and diversity of the 2-oxoglutarate-  
838 dependent dioxygenase superfamily in plants. *The Plant Journal* 78(2), 328-343.
- 839 Kitamura, S., Shikazono, N., and Tanaka, A. (2004). TRANSPARENT TESTA 19 is involved in the  
840 accumulation of both anthocyanins and proanthocyanidins in Arabidopsis. *The Plant Journal*  
841 37(1), 104-114.
- 842 Koncz, C., and Schell, J. (1986). The promoter of TL-DNA gene 5 controls the tissue-specific  
843 expression of chimaeric genes carried by a novel type of Agrobacterium binary vector.  
844 *Molecular Genetics and Genomics* 204, 383-396.
- 845 Krogh, A., Larsson, B., von Heijne, G., and Sonnhammer, E.L.L. (2001). Predicting transmembrane  
846 protein topology with a hidden markov model: application to complete genomes. *Journal of*  
847 *Molecular Biology* 305(3), 567-580.
- 848 Lee, H., Chawla, H.S., Obermeier, C., Dreyer, F., Abbadi, A., and Snowdon, R. (2020).  
849 Chromosome-Scale Assembly of Winter Oilseed Rape Brassica napus. *Frontiers in Plant*  
850 *Science* 11, 496.
- 851 Li, S.F., Milliken, O.N., Pham, H., Seyit, R., Napoli, R., Preston, J., et al. (2009). The Arabidopsis  
852 MYB5 transcription factor regulates mucilage synthesis, seed coat development, and trichome  
853 morphogenesis. *The Plant Cell* 21(1), 72-89.
- 854 Lukacin, R., Wellmann, F., Britsch, L., Martens, S., and Matern, U. (2003). Flavonol synthase from  
855 *Citrus unshiu* is a bifunctional dioxygenase. *Phytochemistry* 62(3), 287-292.
- 856 Luo, P., Ning, G., Wang, Z., Shen, Y., Jin, H., Li, P., et al. (2016). Disequilibrium of Flavonol  
857 Synthase and Dihydroflavonol-4-Reductase Expression Associated Tightly to White vs. Red  
858 Color Flower Formation in Plants. *Frontiers in Plant Science* 6, 1257.
- 859 Mehrtens, F., Kranz, H., Bednarek, P., and Weisshaar, B. (2005). The Arabidopsis transcription  
860 factor MYB12 is a flavonol-specific regulator of phenylpropanoid biosynthesis. *Plant*  
861 *Physiology* 138(2), 1083-1096.
- 862 Muhlemann, J.K., Younts, T.L.B., and Muday, G.K. (2018). Flavonols control pollen tube growth  
863 and integrity by regulating ROS homeostasis during high-temperature stress. *Proceedings of*  
864 *the National Academy of Sciences of the United States of America* 115(47), E11188-E11197.
- 865 Nesi, N., Delourme, R., Bregeon, M., Falentin, C., and Renard, M. (2008). Genetic and molecular  
866 approaches to improve nutritional value of Brassica napus L. seed. *Comptes Rendus Biology*  
867 331(10), 763-771.
- 868 OECD-FAO, and Connell, M.A. (2015). OECD-FAO Agricultural Outlook 2015-2024.
- 869 Olsen, K.M., Slimestad, R., Lea, U.S., Brede, C., Lovdal, T., Ruoff, P., et al. (2009). Temperature  
870 and nitrogen effects on regulators and products of the flavonoid pathway: experimental and  
871 kinetic model studies. *Plant, Cell & Environment* 32(3), 286-299.
- 872 Owens, D.K., Alerding, A.B., Crosby, K.C., Bandara, A.B., Westwood, J.H., and Winkel, B.S.  
873 (2008). Functional analysis of a predicted flavonol synthase gene family in Arabidopsis. *Plant*  
874 *Physiology* 147(3), 1046-1061.



- 875 Park, S., Kim, D.H., Lee, J.Y., Ha, S.H., and Lim, S.H. (2017). Comparative Analysis of Two  
876 Flavonol Synthases from Different-Colored Onions Provides Insight into Flavonoid  
877 Biosynthesis. *Journal of Agricultural and Food Chemistry* 65(26), 5287-5298.
- 878 Park, S., Kim, D.H., Park, B.R., Lee, J.Y., and Lim, S.H. (2019). Molecular and Functional  
879 Characterization of *Oryza sativa* Flavonol Synthase (OsFLS), a Bifunctional Dioxygenase.  
880 *Journal of Agricultural and Food Chemistry* 67(26), 7399-7409.
- 881 Parkin, I.A., Koh, C., Tang, H., Robinson, S.J., Kagale, S., Clarke, W.E., et al. (2014). Transcriptome  
882 and methylome profiling reveals relics of genome dominance in the mesopolyploid *Brassica*  
883 *oleracea*. *Genome Biology* 15(6), R77.
- 884 Peer, W.A., and Murphy, A.S. (2007). Flavonoids and auxin transport: modulators or regulators?  
885 *Trends in Plant Science* 12(12), 556-563.
- 886 Pelletier, M.K., Burbulis, I.E., and Shirley, B.W. (1999). Disruption of specific flavonoid genes  
887 enhances the accumulation of flavonoid enzymes and endproducts in *Arabidopsis* seedlings.  
888 *Plant Molecular Biology* 40(1), 45-54.
- 889 Pelletier, M.K., Murrell, J.R., and Shirley, B.W. (1997). Characterization of flavonol synthase and  
890 leucoanthocyanidin dioxygenase genes in *Arabidopsis*. *Plant Physiology* 113(4), 1437-1445.
- 891 Penfield, S., Meissner, R.C., Shoue, D.A., Carpita, N.C., and Bevan, M.W. (2001). MYB61 Is  
892 Required for Mucilage Deposition and Extrusion in the *Arabidopsis* Seed Coat. *The Plant*  
893 *Cell* 13(12), 2777-2791.
- 894 Pettersen, E.F., Goddard, T.D., Huang, C.C., Couch, G.S., Greenblatt, D.M., Meng, E.C., et al.  
895 (2004). UCSF Chimera--a visualization system for exploratory research and analysis. *Journal*  
896 *of computational chemistry* 25(13), 1605-1612.
- 897 Prescott, A.G., and John, P. (1996). DIOXYGENASES: Molecular Structure and Role in Plant  
898 Metabolism. *Annual Review of Plant Physiology and Plant Molecular Biology* 47, 245-271.
- 899 Prescott, A.G., Stamford, N.P.J., Wheeler, G., and Firmin, J.L. (2002). In vitro properties of a  
900 recombinant flavonol synthase from *Arabidopsis thaliana*. *Phytochemistry* 60(6), 589-593.
- 901 Preuss, A., Stracke, R., Weisshaar, B., Hillebrecht, A., Matern, U., and Martens, S. (2009).  
902 *Arabidopsis thaliana* expresses a second functional flavonol synthase. *FEBS Letters* 583(12),  
903 1981-1986.
- 904 Price, M.N., Dehal, P.S., and Arkin, A.P. (2009). FastTree: computing large minimum evolution  
905 trees with profiles instead of a distance matrix. *Molecular Biology and Evolution* 26(7), 1641-  
906 1650.
- 907 Pucker, B., Holtgräwe, D., Rosleff Sörensen, T., Stracke, R., Viehöver, P., and Weisshaar, B. (2016).  
908 A De Novo Genome Sequence Assembly of the *Arabidopsis thaliana* Accession Niederzenz-1  
909 Displays Presence/Absence Variation and Strong Synteny. *PLoS ONE* 11(10), e0164321.
- 910 Pucker, B., Holtgräwe, D., and Weisshaar, B. (2017). Consideration of non-canonical splice sites  
911 improves gene prediction on the *Arabidopsis thaliana* Niederzenz-1 genome sequence. *BMC*  
912 *Research Notes* 10(1), 667.
- 913 Pucker, B., Reiher, F., and Schilbert, H.M. (2020). Automatic Identification of Players in the  
914 Flavonoid Biosynthesis with Application on the Biomedicinal Plant *Croton tiglium*. *Plants*  
915 9(9).

- 916 Qu, C., Zhao, H., Fu, F., Wang, Z., Zhang, K., Zhou, Y., et al. (2016). Genome-Wide Survey of  
917 Flavonoid Biosynthesis Genes and Gene Expression Analysis between Black- and Yellow-  
918 Seeded *Brassica napus*. *Frontiers in Plant Science* 7, 1755.
- 919 Robert, X., and Gouet, P. (2014). Deciphering key features in protein structures with the new  
920 ENDscript server. *Nucleic Acids Research* 42(Web Server issue), W320-W324.
- 921 Roy, A., Kucukural, A., and Zhang, Y. (2010). I-TASSER: a unified platform for automated protein  
922 structure and function prediction. *Nature Protocols* 5(4), 725-738.
- 923 Seitz, C., Ameres, S., and Forkmann, G. (2007). Identification of the molecular basis for the  
924 functional difference between flavonoid 3'-hydroxylase and flavonoid 3',5'-hydroxylase.  
925 *FEBS Letters* 581(18), 3429-3434.
- 926 Shan, X., Li, Y., Yang, S., Yang, Z., Qiu, M., Gao, R., et al. (2020). The spatio-temporal biosynthesis  
927 of floral flavonols is controlled by differential phylogenetic MYB regulators in *Freesia*  
928 *hybrida*. *New Phytologist*.
- 929 Sheehan, H., Moser, M., Klahre, U., Esfeld, K., Dell'Olivo, A., Mandel, T., et al. (2015). MYB-FL  
930 controls gain and loss of floral UV absorbance, a key trait affecting pollinator preference and  
931 reproductive isolation. *Nature Genetics*.
- 932 Song, J.M., Guan, Z., Hu, J., Guo, C., Yang, Z., Wang, S., et al. (2020). Eight high-quality genomes  
933 reveal pan-genome architecture and ecotype differentiation of *Brassica napus*. *Nature Plants*  
934 6(1), 34-45.
- 935 Stracke, R., De Vos, R.C.H., Bartelniewoehner, L., Ishihara, H., Sagasser, M., Martens, S., et al.  
936 (2009). Metabolomic and genetic analyses of flavonol synthesis in *Arabidopsis thaliana*  
937 support the *in vivo* involvement of leucoanthocyanidin dioxygenase. *Planta* 229(2), 427-445.
- 938 Stracke, R., Ishihara, H., Huep, G., Barsch, A., Mehrtens, F., Niehaus, K., et al. (2007). Differential  
939 regulation of closely related R2R3-MYB transcription factors controls flavonol accumulation  
940 in different parts of the *Arabidopsis thaliana* seedling. *The Plant Journal* 50(4), 660-677.
- 941 Stracke, R., Jahns, O., Keck, M., Tohge, T., Niehaus, K., Fernie, A.R., et al. (2010). Analysis of  
942 PRODUCTION OF FLAVONOL GLYCOSIDES-dependent flavonol glycoside  
943 accumulation in *Arabidopsis thaliana* plants reveals MYB11-, MYB12- and MYB111-  
944 independent flavonol glycoside accumulation. *New Phytologist* 188(4), 985-1000.
- 945 Takahashi, R., Githiri, S.M., Hatayama, K., Dubouzet, E.G., Shimada, N., Aoki, T., et al. (2007). A  
946 single-base deletion in soybean flavonol synthase gene is associated with magenta flower  
947 color. *Plant Molecular Biology* 63(1), 125-135.
- 948 Turnbull, J.J., Nakajima, J., Welford, R.W., Yamazaki, M., Saito, K., and Schofield, C.J. (2004).  
949 Mechanistic studies on three 2-oxoglutarate-dependent oxygenases of flavonoid biosynthesis:  
950 anthocyanidin synthase, flavonol synthase, and flavanone 3-beta-hydroxylase. *Journal of*  
951 *Biological Chemistry* 279(2), 1206-1216.
- 952 Usadel, B., Obayashi, T., Mutwil, M., Giorgi, F.M., Bassel, G.W., Tanimoto, M., et al. (2009). Co-  
953 expression tools for plant biology: opportunities for hypothesis generation and caveats. *Plant,*  
954 *Cell & Environment* 32(12), 1633-1651.
- 955 Vu, T.T., Jeong, C.Y., Nguyen, H.N., Lee, D., Lee, S.A., Kim, J.H., et al. (2015). Characterization of  
956 *Brassica napus* Flavonol Synthase Involved in Flavonol Biosynthesis in *Brassica napus* L.  
957 *Journal of Agricultural & Food Chemistry* 63(35), 7819-7829.

- 958 Wanasundara, J.P.D., McIntosh, T.C., Perera, S.P., Withana-Gamage, T.S., and Mitra, P. (2016).  
959 Canola/rapeseed protein-functionality and nutrition. *Oilseeds & fats Crops and Lipids* 23(4).
- 960 Wang, X., Wang, H., Wang, J., Sun, R., Wu, J., Liu, S., et al. (2011). The genome of the  
961 mesopolyploid crop species *Brassica rapa*. *Nature Genetics* 43(10), 1035-1039.
- 962 Wang, Y., Meng, G., Chen, S., Chen, Y., Jiang, J., and Wang, Y.P. (2018). Correlation Analysis of  
963 Phenolic Contents and Antioxidation in Yellow- and Black-Seeded *Brassica napus*. *Molecules*  
964 23(7), 1815.
- 965 Weisshaar, B., and Jenkins, G.I. (1998). Phenylpropanoid biosynthesis and its regulation. *Current*  
966 *Opinion in Plant Biology* 1, 251-257.
- 967 Welford, R.W.D., Turnbull, J.J., Claridge, T.D.W., Prescott, A.G., and Schofield, C.J. (2001).  
968 Evidence for oxidation at C-3 of the flavonoid C-ring during anthocyanin biosynthesis.  
969 *Chemical Communications* (18), 1828-1829.
- 970 Wellmann, F., Lukacin, R., Moriguchi, T., Britsch, L., Schiltz, E., and Matern, U. (2002). Functional  
971 expression and mutational analysis of flavonol synthase from *Citrus unshiu*. *European*  
972 *Journal of Biochemistry* 269(16), 4134-4142.
- 973 Williams, C.A., and Grayer, R.J. (2004). Anthocyanins and other flavonoids. *Natural Product*  
974 *Reports* 21(4), 539-573.
- 975 Winkel-Shirley, B. (2001). Flavonoid biosynthesis. A colorful model for genetics, biochemistry, cell  
976 biology, and biotechnology. *Plant Physiology* 126, 485-493.
- 977 Winkel-Shirley, B. (2002). Biosynthesis of flavonoids and effects of stress. *Current Opinion in Plant*  
978 *Biology* 5(3), 218-223.
- 979 Wisman, E., Hartmann, U., Sagasser, M., Baumann, E., Palme, K., Hahlbrock, K., et al. (1998).  
980 Knock-out mutants from an En-1 mutagenized *Arabidopsis thaliana* population generate new  
981 phenylpropanoid biosynthesis phenotypes. *Proceedings of the National Academy of Sciences*  
982 *of the United States of America* 95(21), 12432-12437.
- 983 Xu, F., Li, L., Zhang, W., Cheng, H., Sun, N., Cheng, S., et al. (2012). Isolation, characterization,  
984 and function analysis of a flavonol synthase gene from *Ginkgo biloba*. *Molecular Biology*  
985 *Reports* 39(3), 2285-2296.
- 986 Xu, W., Lepiniec, L., and Dubos, C. (2014). New insights toward the transcriptional engineering of  
987 proanthocyanidin biosynthesis. *Plant Signaling & Behavior* 9(6).
- 988 Yin, N.W., Wang, S.X., Jia, L.D., Zhu, M.C., Yang, J., Zhou, B.J., et al. (2019). Identification and  
989 Characterization of Major Constituents in Different-Colored Rapeseed Petals by UPLC-  
990 HESI-MS/MS. *Journal of Agricultural and Food Chemistry* 67(40), 11053-11065.
- 991 Yonekura-Sakakibara, K., Fukushima, A., Nakabayashi, R., Hanada, K., Matsuda, F., Sugawara, S.,  
992 et al. (2012). Two glycosyltransferases involved in anthocyanin modification delineated by  
993 transcriptome independent component analysis in *Arabidopsis thaliana*. *The Plant Journal*  
994 69(1), 154-167.
- 995 Zhang, Q., Zhao, X., and Qiu, H. (2013). "Flavones and Flavonols: Phytochemistry and  
996 Biochemistry," in *Natural Products*, eds. K.G. Ramawat & J.M. Merillon. Springer-Verlag  
997 Berlin Heidelberg, 1821-1847.

3 x malonyl CoA + 4-coumaroyl CoA

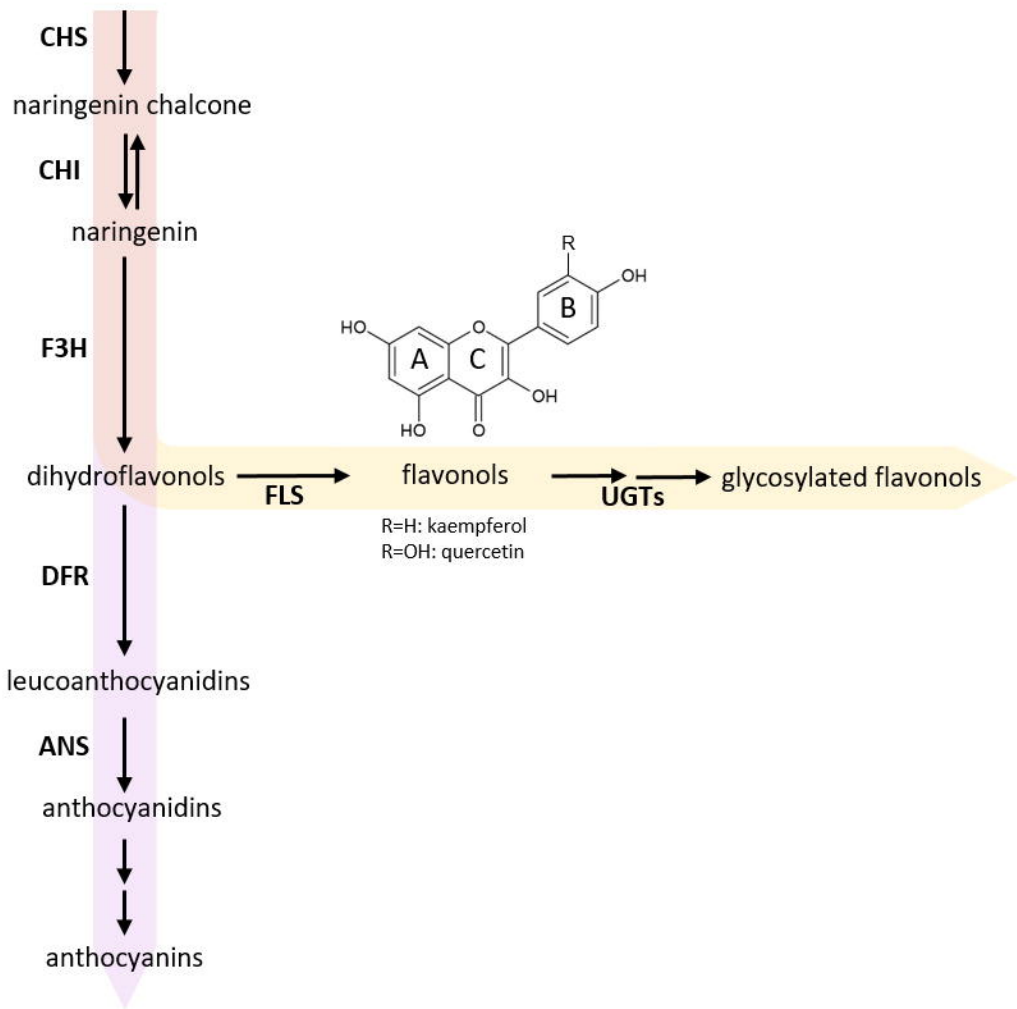



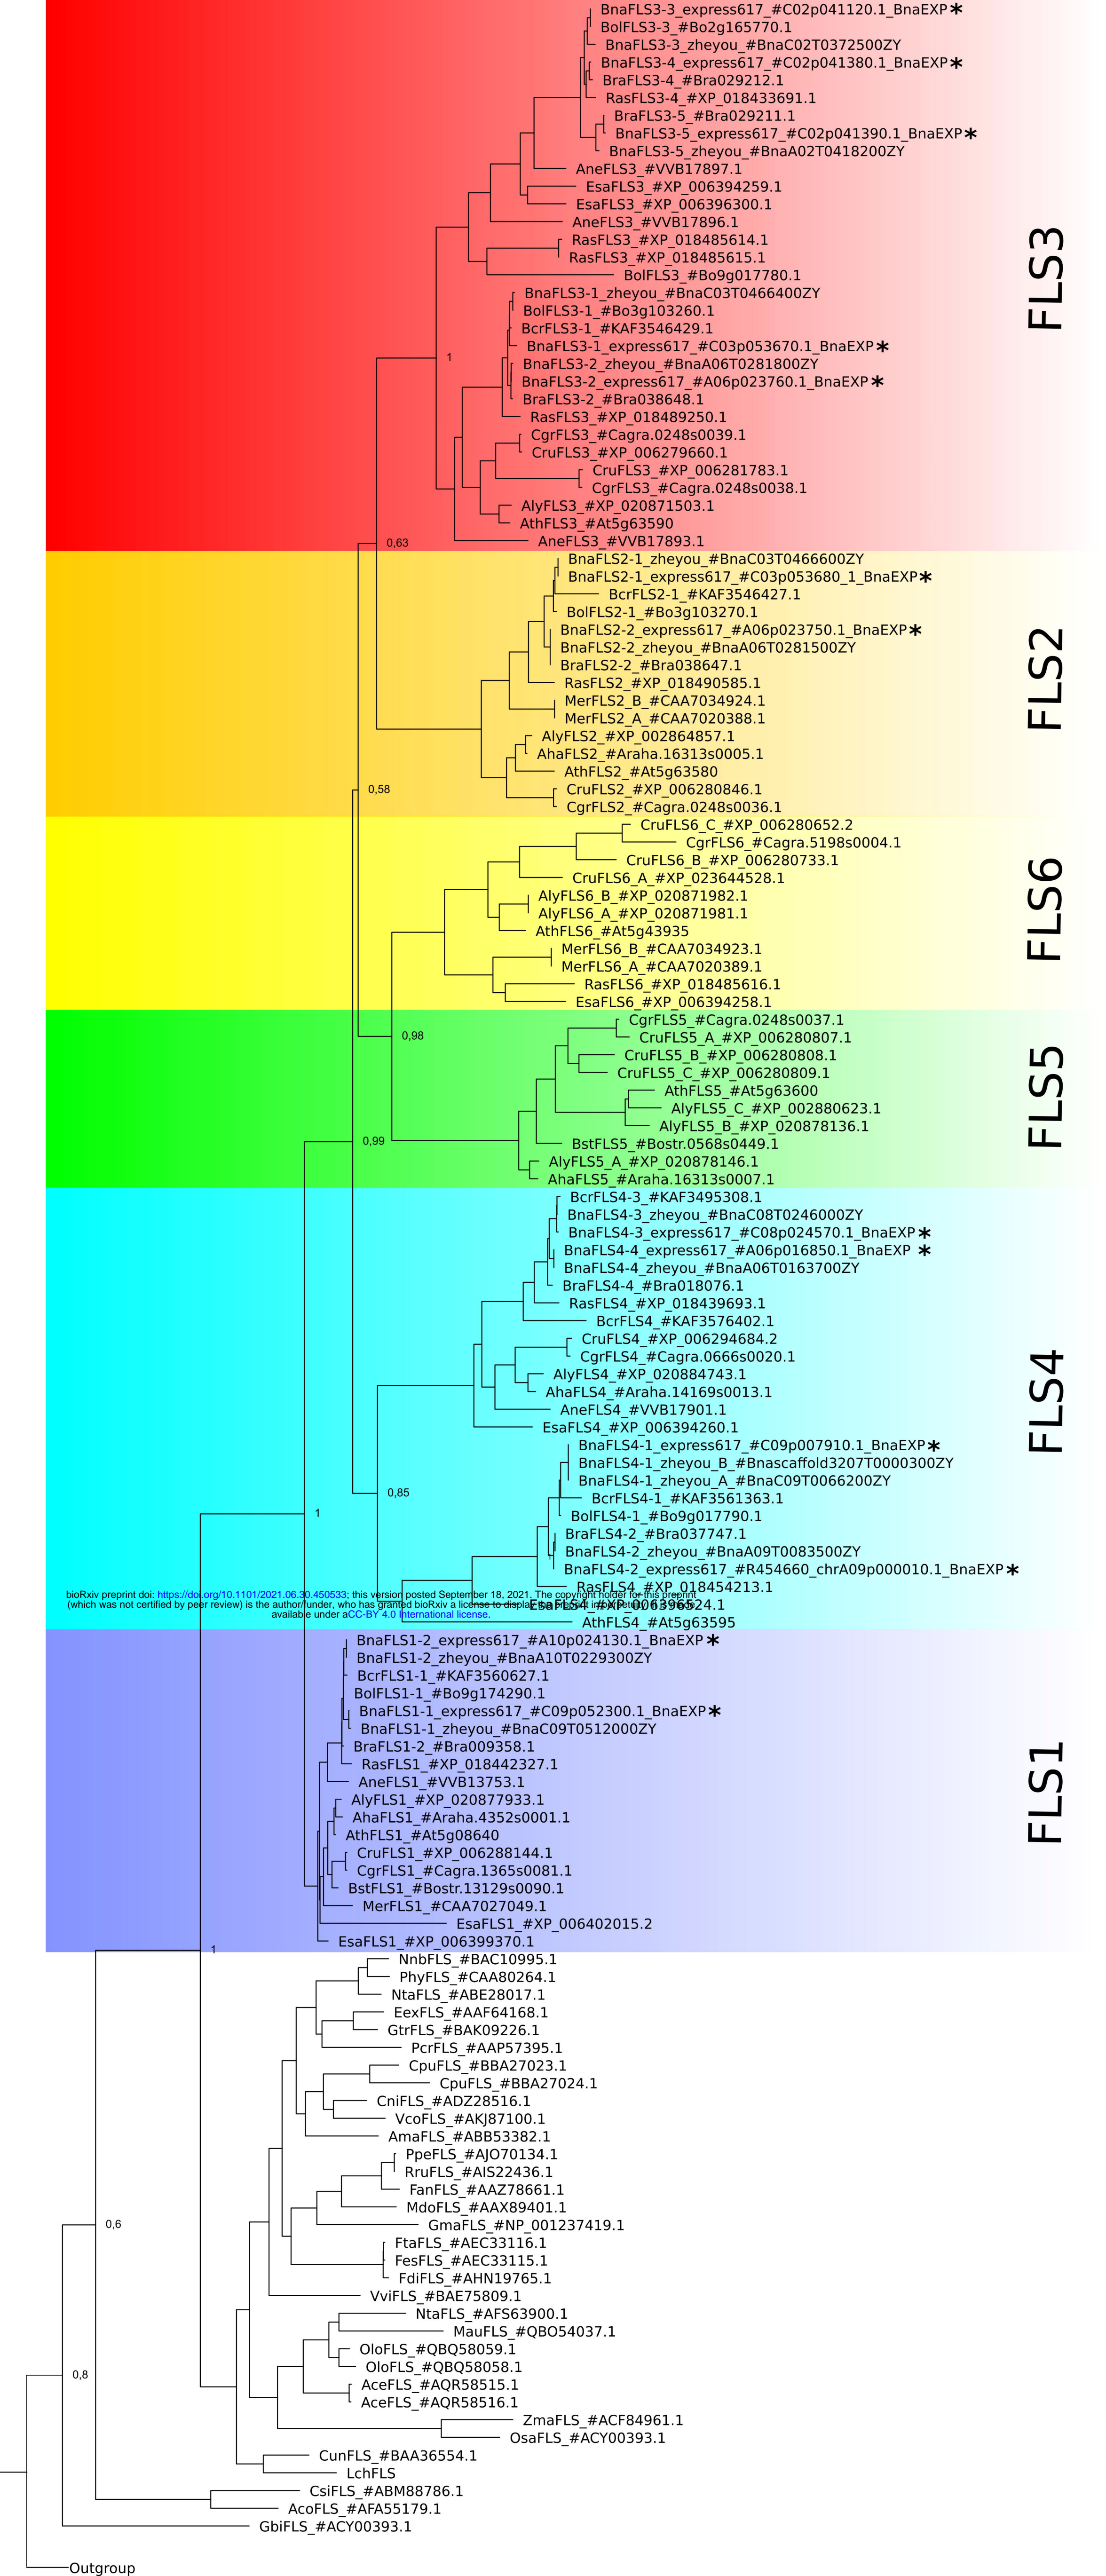



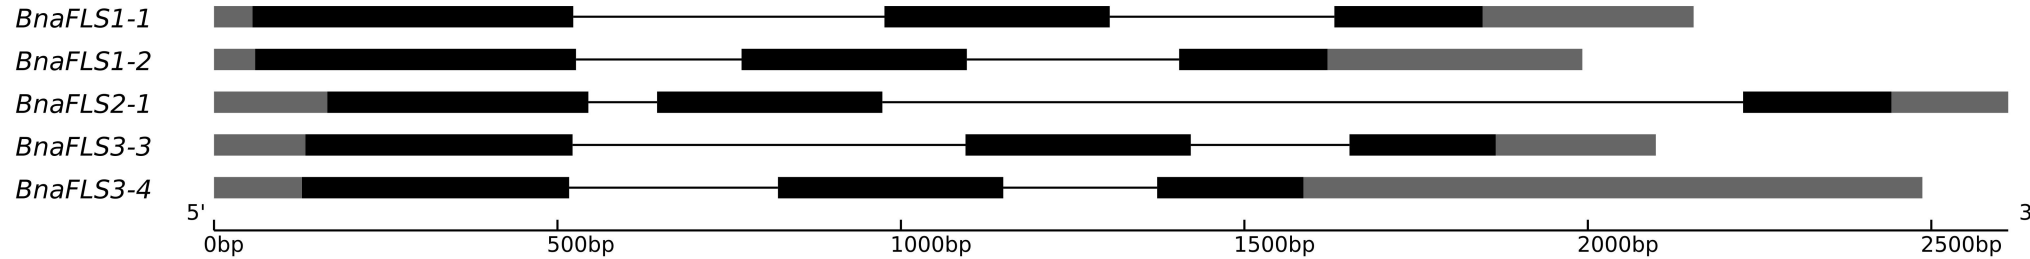

Legend:  
■ CDS    ■ UTR    — Intron

**AthFLS1**  
 1 10 20 30  
 MEVERVQDISSSSLTEAIPLEFIRSEKEQP...AITTFRGPTP.AIPVVDLSDPDE...  
**BnaFLS1-1**  
 MEIERVQDISSSSLHTEVIPLEFIRSEKEQP...AITTFRGVVP.AIPVVDLSDPDE...  
**BnaFLS1-2**  
 MEIERVQDISSSSLHTEAIPLEFIRSEKEQP...AITTFRGVVP.AIPVVDLSDPDE...  
**AthFLS2**  
 MEVERDQHISPPSLMAK...TIPILIDLSNLDE...  
**BnaFLS2-1**  
 MEVKRYQPTSPSS...E...TIPILIDLSNPDE...  
**AthFLS3**  
 MEMEKNQHISSLD...TIPVIDLSNPDE...  
**BnaFLS3-3**  
 ...MAEVPV...SKFQGTSPVDFIPVDLSNPNE...  
**BnaFLS3-4**  
 ...MAESVP...SKFQGTSPVDFIPVDLSNPNE...  
**AthF3H**  
 MAPGTLTELAGESKLS...KFRVDEDERPKVAYNVFSD...ETPVISLAGIDDDVDGK  
 acc

**AthFLS1**  
 α2 β2 α3 α4 TT  
 60 70 80 90 100 110  
 .ESVRRAVVKASEEWGLFQVNVHGIPTELIRRLQDVGRKFFELPSPSEKESVAKPEDSKDI  
**BnaFLS1-1**  
 .ESVARAVVKASEEWGIFQVNVHGIPTELIKRRLQEVGRTFFELPSPSEKESVAKPADAKDI  
**BnaFLS1-2**  
 .ESVARAVVKASEEWGIFQVNVHGIPTELIKRRLQEVGRTFFELPSPSEKESVAKPVDAKDI  
**AthFLS2**  
 .ELVAHAVVKGSEEWGIFVHVNHGIPMDLIQRLLKDVGTQFFELPETEKKAVAKPGDSDKF  
**BnaFLS2-1**  
 .ELVSRAVVKASQEWGIFVHVNHGIPMDLIQRLLKDVGTQFFELPETEKKAVAKPDSQDF  
**AthFLS3**  
 .ELVASAVVKASQEWGIFQVNVHGIPTELILRRLQVGMFFELPETEKAVAKPEDSLDI  
**BnaFLS3-3**  
 .DLVARAVVKASETWGMFQVNVHGIPTELMRRLKELGTFFELPEKEKEAVARPADSTDL  
**BnaFLS3-4**  
 .DLVARAVVKASETWGMFQVNVHGIPIELMRRLKELGTFFELPEKEKEAVARPADSTDL  
**AthF3H**  
 RGEICRQIVAEACENWGIQVNVHGVDTNLVADMTRLARDFFALP...PEDKLRF  
 acc

**AthFLS1**  
 β3 TT β4 η3  
 120 130 140 150 160  
 E.....GYGTLKQKDPEGKKAWVDHLFHRWIWPPSCVNYRFPKPNPEYREVNEEYAVH  
**BnaFLS1-1**  
 E.....GYGTLKQKEVEGKKAWVDHLFHRWIWPPSCVNYRFPKPNPEYREVNEEYALH  
**BnaFLS1-2**  
 E.....GYGTLKQKEVEGKKAWVDHLFHRWIWPPSCVNYRFPKPNPEYREVNEEYALH  
**AthFLS2**  
 E.....GYTTNLKYVKG.EVWNTENLFHRWIWPPSCINFDYWPKNPPQYREVIEEYTFKE  
**BnaFLS2-1**  
 E.....GYTRNLKYTEG.EVWADNLFHRWIPQSCINIKYWPKNPEYREVIEEYTFKE  
**AthFLS3**  
 E.....GYRTYQKDLGRNAWVDHLFHRWIWPPSRVNHKFFPKPNPEYIEVNEEYASH  
**BnaFLS3-3**  
 E.....GYTTDYKDDGEGRKTWADHLFHRWIWPPSRINRYRFPKNSPDYREVNEEYAKE  
**BnaFLS3-4**  
 E.....GYTTDYKDDGEGRKTWADHLFHRVWPPSRINRYRFPKNSPDYREVNEEYAKE  
**AthF3H**  
 DMSSGKKKGFIIVSSHQGEAVQDWRREIVTYFSYVVRNRDYSRWPDKPEGWVKVTEEYSER  
 acc

**AthFLS1**  
 α5 α6 η4 β5 η5 β6  
 170 180 190 200 210 220  
 VKKLSSETLLGLSDGLGLKRDALEKGLGGGMAEYMMKINYYPPCPRPDLAIGVPAHTDLS  
**BnaFLS1-1**  
 VKKLSSETLLGLSEGLGLRREALREGLGGDLVEYMMKINYYPPCPRPDLALGVPAHTDLS  
**BnaFLS1-2**  
 VKKLSSETLLGLSEGLGLRREALREGLGGDLVEYMMKINYYPPCPRPDLALGVPAHTDLS  
**AthFLS2**  
 TKKLSERILGLYSEGLGLPSEALIQGLGGSETEYVMRINNNPPDKPDLTLGVPEHTDIT  
**BnaFLS2-1**  
 TKKLSERLLGLYSEGLGLRHEALKEGLGGSEKSEYVLRINNNPPDKPDLTLGLPEHTDIV  
**AthFLS3**  
 IKKLSSEKIMWGLSEGLGLRHEALKEGLGGSEKSEYVLMKIFYPKPKLELLYGLVPAHTDLS  
**BnaFLS3-3**  
 IKKLSSEKIMWGLSEGLGLRHEALKEGLGGSEKSEYVLMKIFYPKPKLELLYGLVPAHTDLS  
**BnaFLS3-4**  
 IKKLSSEKIMWGLSEGLGLRHEALKEGLGGSEKSEYVLMKIFYPKPKLELLYGLVPAHTDLS  
**AthF3H**  
 LMSLACKLLEVLSEAMGLEKESLTNAC..VDMQKIVVNYYPKCPQDLTLGLKRHTDIPG  
 acc

**AthFLS1**  
 β7 β8 TT β9 TT β10 α7 β11  
 230 240 250 260 270 280  
 GITLLVPEVEVGLQVFKDD..HWFDAEYIPSAVIVHIGDQILRLSNGRYKNVLRHTTVDK  
**BnaFLS1-1**  
 GITLLVPEVEVGLQVFKDD..HWFDAEYIPSAVIVHIGDQILRLSNGRYKNVLRHTTVDK  
**BnaFLS1-2**  
 GITLLVPEVEVGLQVFKDD..HWFDAEYIPSAVIVHIGDQILRLSNGRYKNVLRHTTVDK  
**AthFLS2**  
 GATIIITNEVPEVGLQVFKDD..HWDVHYIPSSITVNIQDIM.....  
**BnaFLS2-1**  
 ALALIVTNEVPEVGLQVFEH..HWFVQVYVPSISITVNIQDIM.....  
**AthFLS3**  
 GITLLVNEALGLQAFKDN..OWFDAEYITSGIVVIGDQILRMSNGRYKSVLRHAKMDK  
**BnaFLS3-3**  
 GITFLIADVEVGLQAFQDN..KWVDVYDDSGIVVIGDQIKRMSNGRYKSGEHRATITD  
**BnaFLS3-4**  
 GITFLIADVEVGLQAFQDN..KWVDVYDDSGIVVIGDQIKRMSNGRYKSGEHRATITD  
**AthF3H**  
 TITLLQLDQVGLQATRDNKGTWITVQPVGEGAVVNLGDHGHFLSNGRFKNADHQAVVNS  
 acc

**AthFLS1**  
 β12 TT β13 η6 β14 α8  
 290 300 310 320 330  
 EKTRMSWVVFLEPPPREKIVGP...LPSEL.TGDDNPPKFPFAFKDYSYRKLNK  
**BnaFLS1-1**  
 DRTRMSWVVFLEPHREMIVGP...LPSEL.ISDGNPPKFPFAFKDYSYRKLNK  
**BnaFLS1-2**  
 DRTRMSWVVFLEPHREMIVGP...LPSEL.ISDGNPPKFPFAFKDYSYRKLNK  
**AthFLS2**  
 ...AEQWKV...QECVA...  
**BnaFLS2-1**  
 EKQRMSWVVFVDANPDVIVR...LPSELITGDN.PNSMFKSIIICKDFKYRRLYK  
**AthFLS3**  
 EKTRISWVVFVSSLDQVFGP...LPSELITGDNVPPKFPYVYKDFKFLKLNK  
**BnaFLS3-3**  
 VRTRLSWVVFVFAEPNLDHVVG...LPSELVIDD..APKFKPYVYREYKFLKMNK  
**BnaFLS3-4**  
 VRTRLSWVVFVFAEPNLDHVVG...LPSELVIDD..APKFKPYVYREYKFLKMNK  
**AthF3H**  
 NSSRLSIAITFQNPAPDATVYPLKRVREGEKALILEPIT...FAEMYKRMGRDLELARLNK  
 acc

**AthFLS1**  
 TT  
**AthFLS1**  
 L.....PLD...  
**BnaFLS1-1**  
 L.....PLD...  
**BnaFLS1-2**  
 L.....PLD...  
**AthFLS2**  
 L.....PVD...  
**BnaFLS2-1**  
 L.....PVD...  
**AthFLS3**  
 L.....LLD...  
**BnaFLS3-3**  
 L.....PLE...  
**BnaFLS3-4**  
 L.....PLE...  
**AthF3H**  
 LAKEERDHEVDKPVQDQIFA  
 acc



**A**

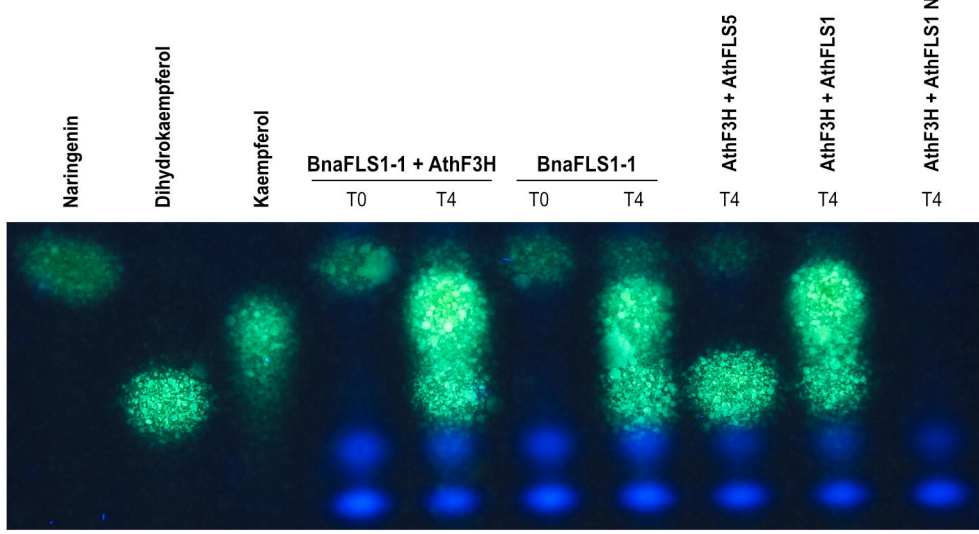

**B**

bioRxiv preprint doi: <https://doi.org/10.1101/2021.06.30.450533>; this version posted September 18, 2021. The copyright holder for this preprint (which was not certified by peer review) is the author/funder, who has granted bioRxiv a license to display the preprint in perpetuity. It is made available under aCC-BY 4.0 International license.

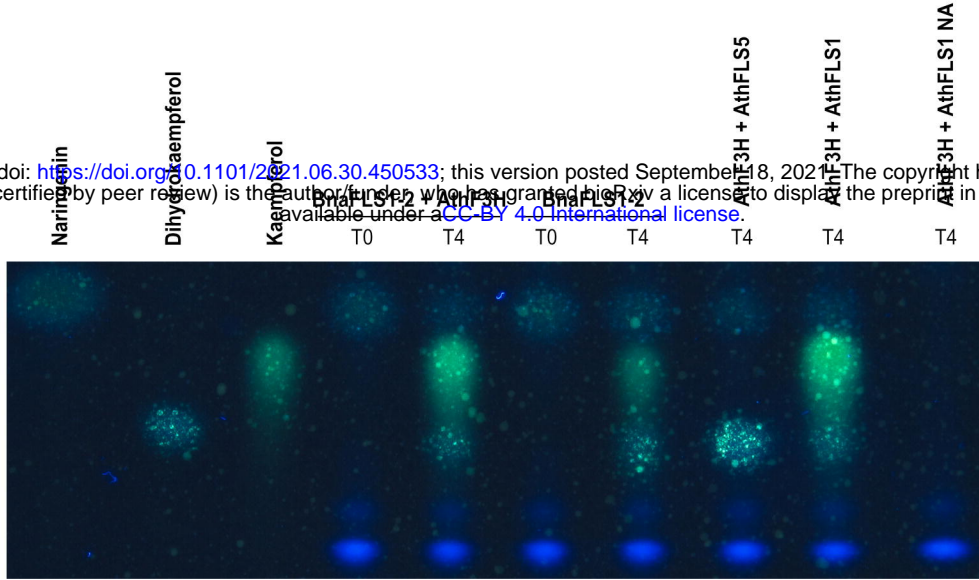

**C**

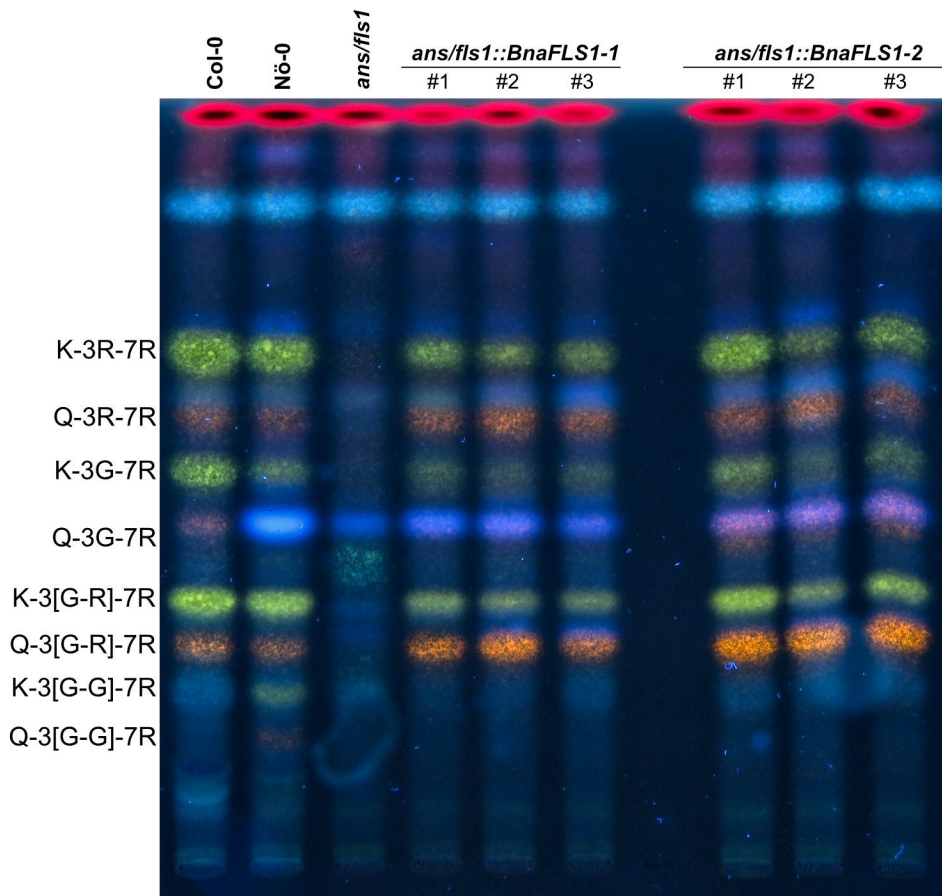

**D**

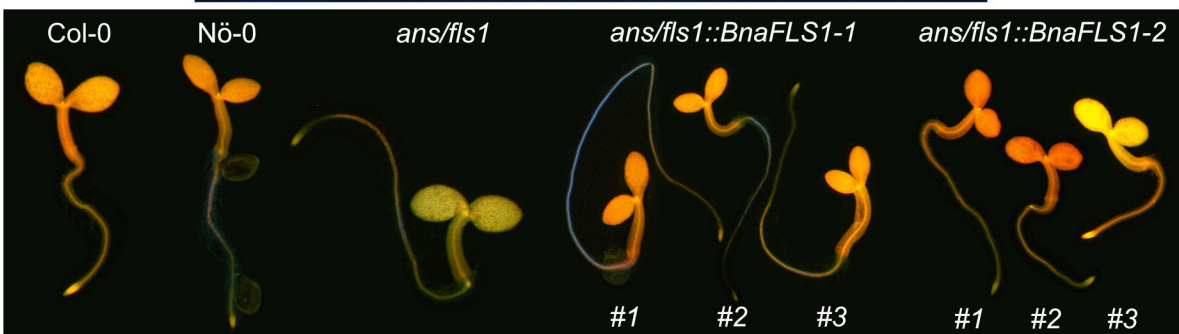

**E**

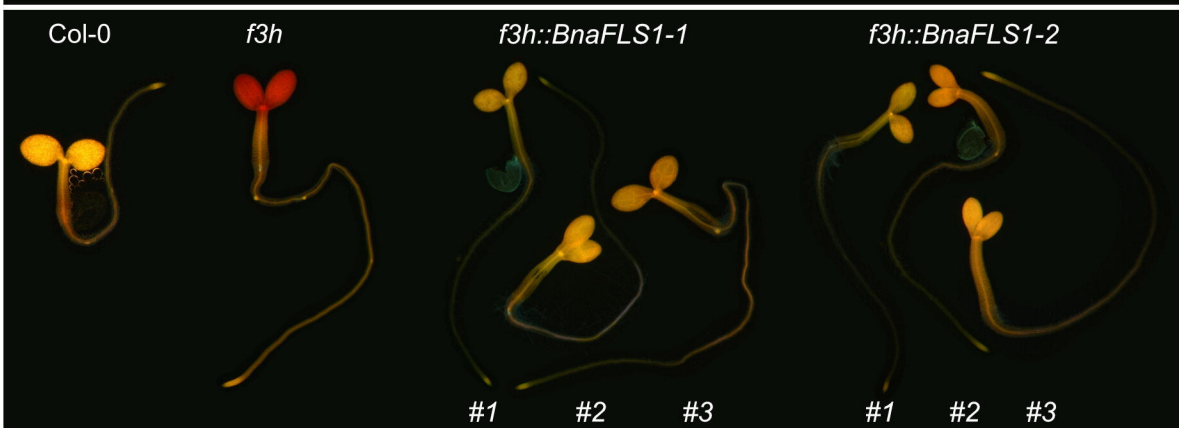

**A**

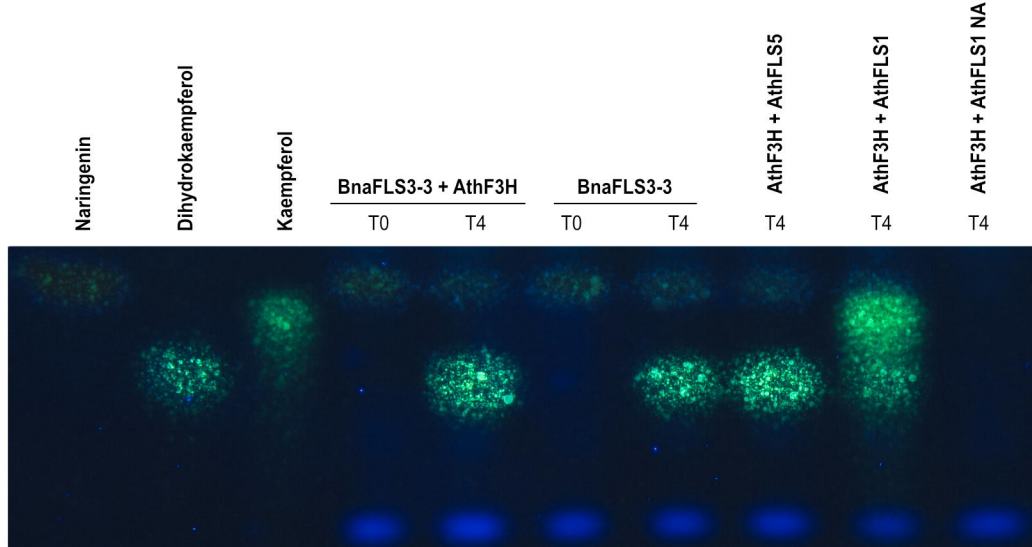

**B**

bioRxiv preprint doi: <https://doi.org/10.1101/2021.06.30.450533>; this version posted September 8, 2021. The copyright holder for this preprint (which was not certified by peer review) is the author/funder, who has granted bioRxiv a license to display the preprint in perpetuity. It is made available under aCC-BY 4.0 International license.

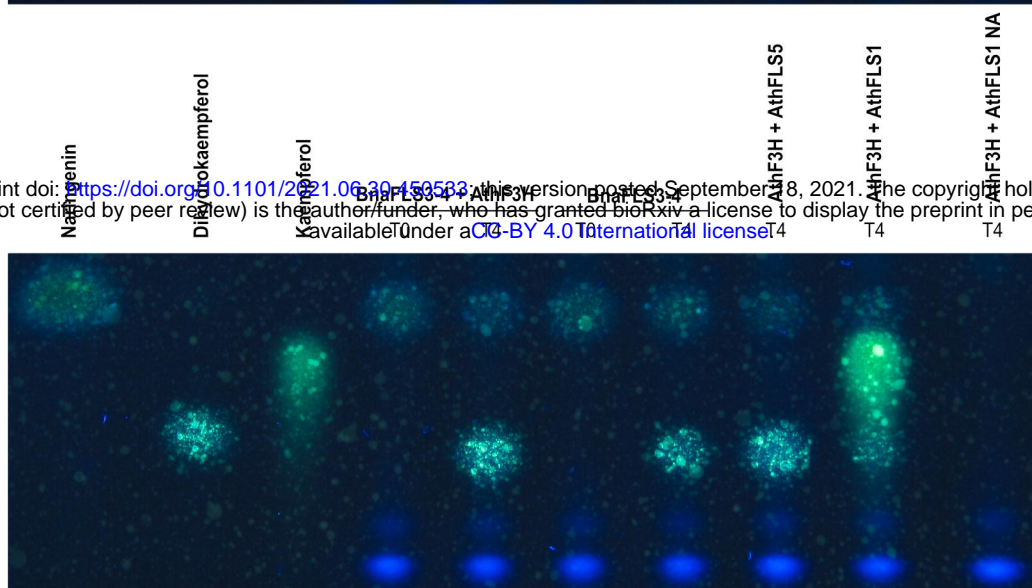

**C**

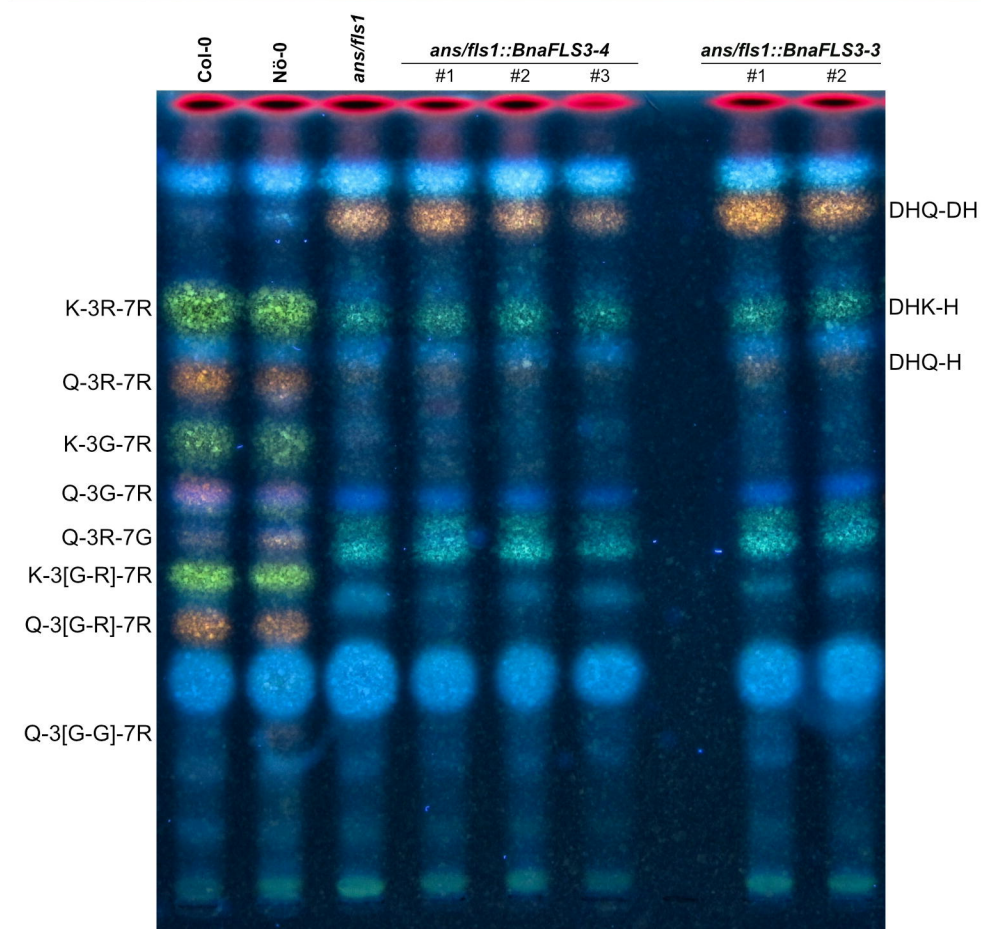

**D**

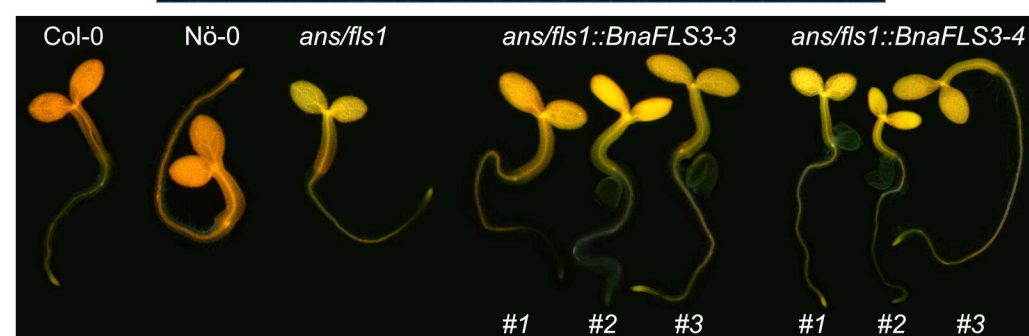

**E**

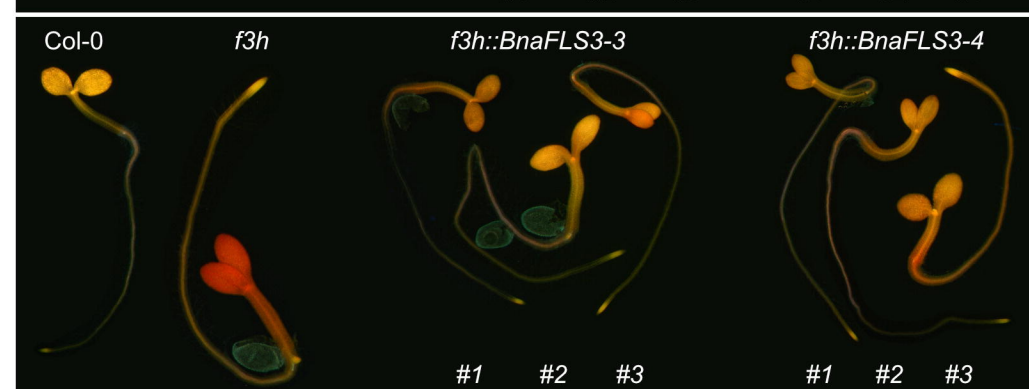



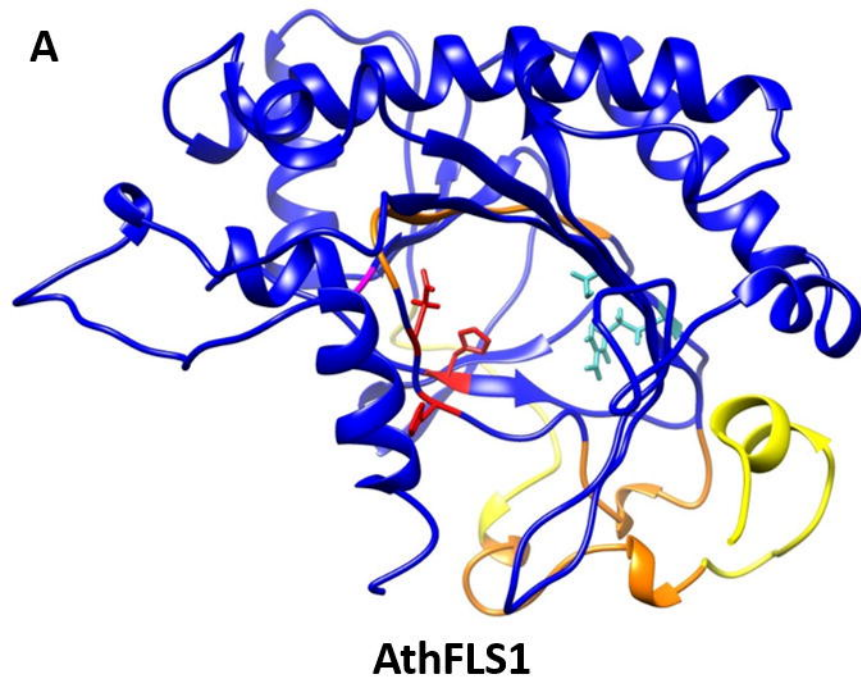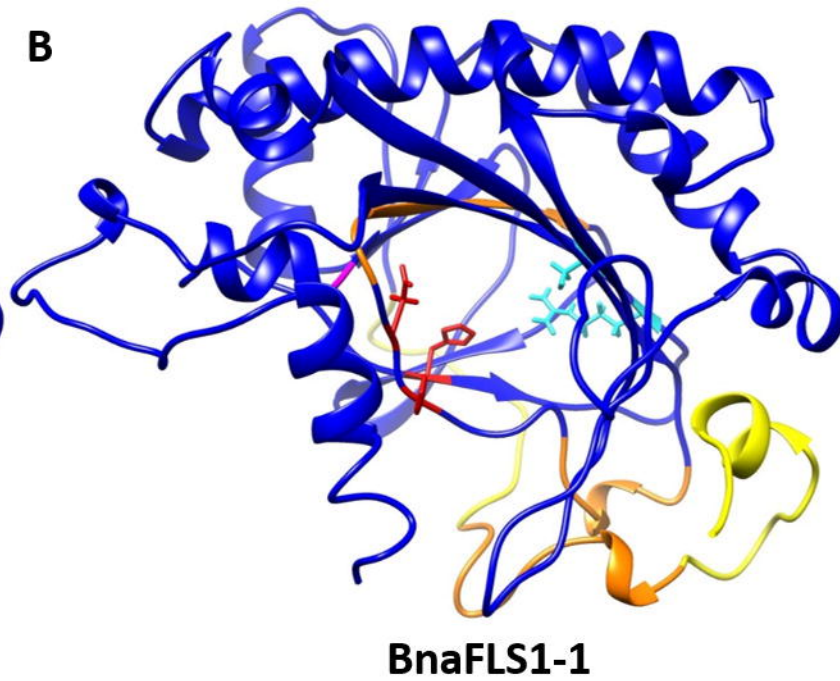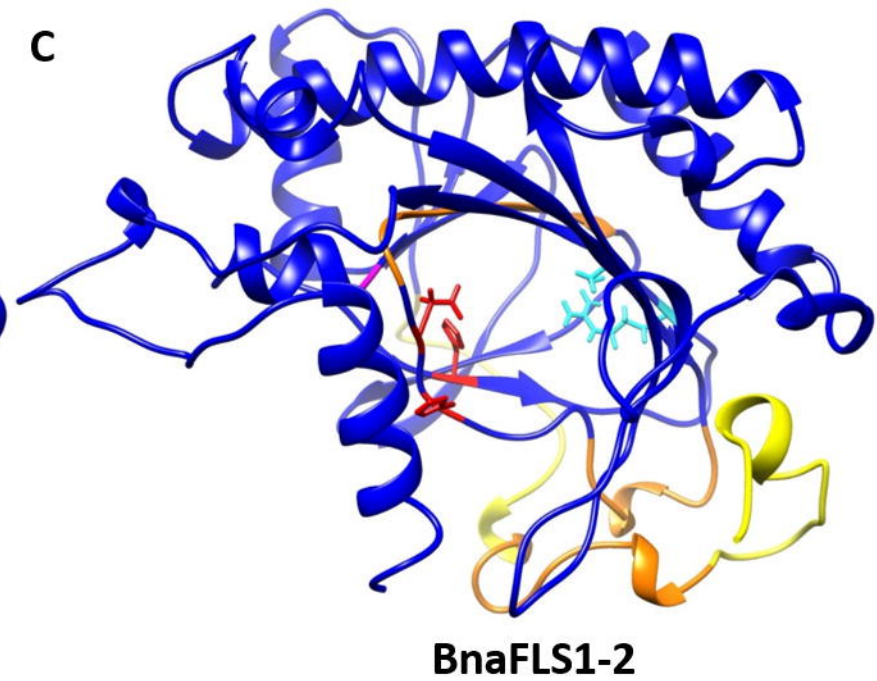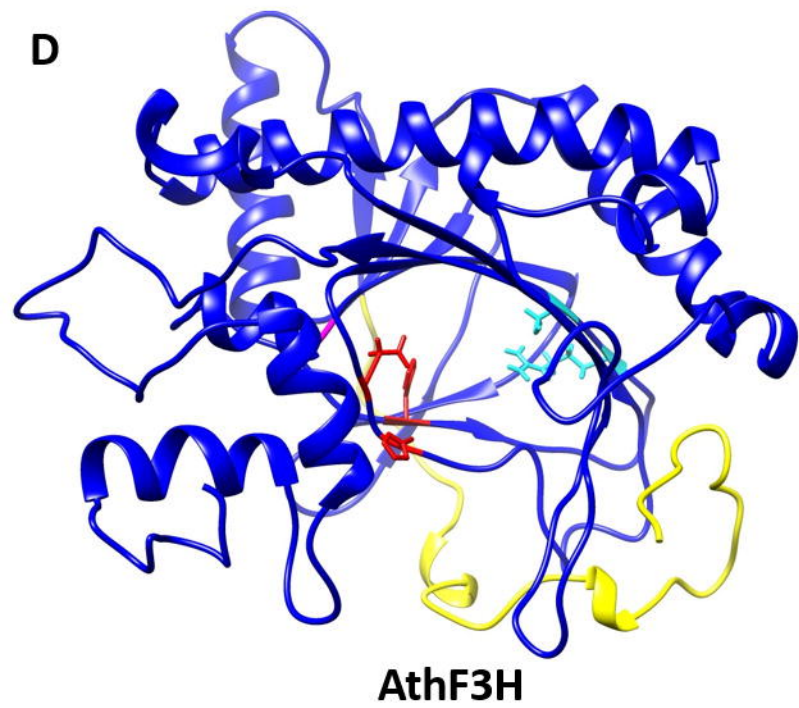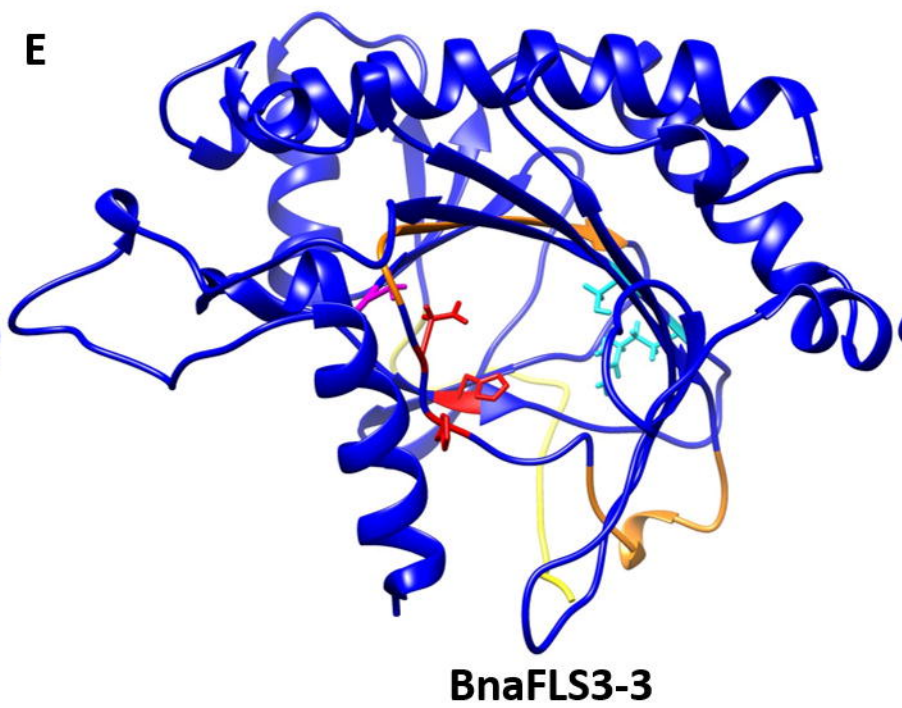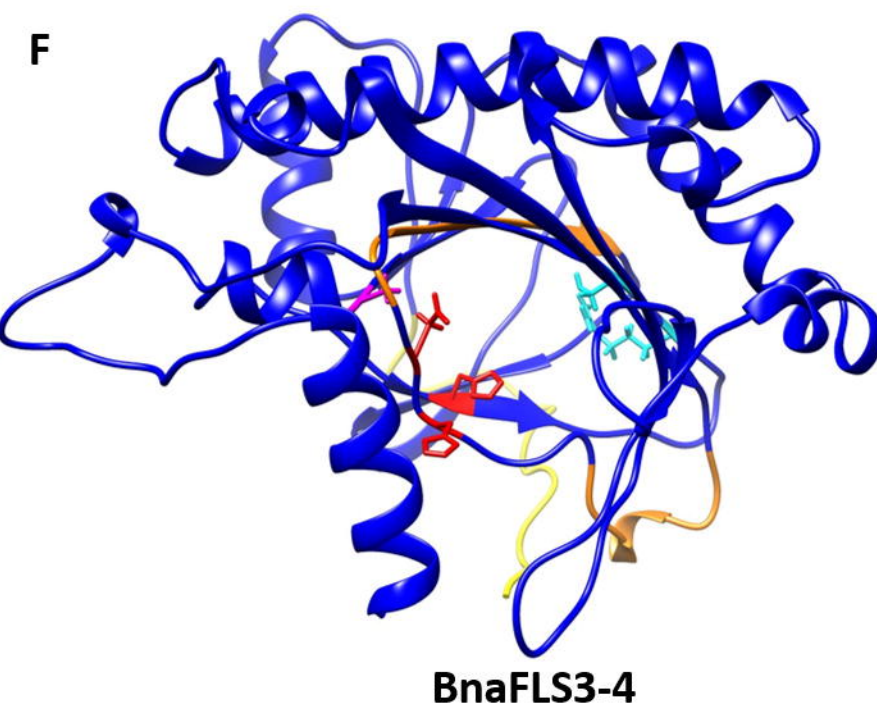



3 x malonyl CoA + 4-coumaroyl CoA

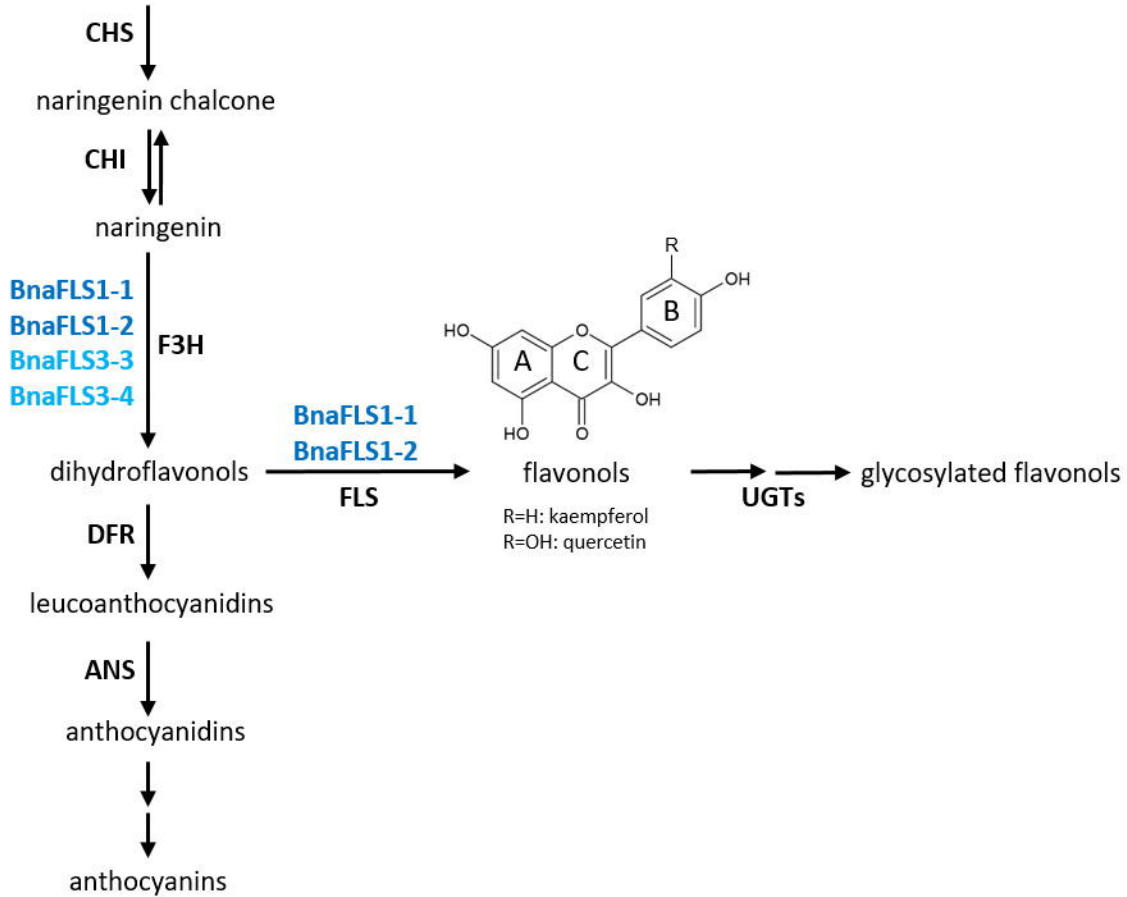

Source: https://www.biorxiv.org/content/10.1101/2021.06.30.450533v2.full.pdf
