# Supplementary material for: Characterization of the Brassica napus flavonol synthase gene family reveals bifunctional flavonol synthases
Source: bioRxiv or medRxiv preprint supplement (doi:10.1101/2021.06.30.450533), 2021-09-18

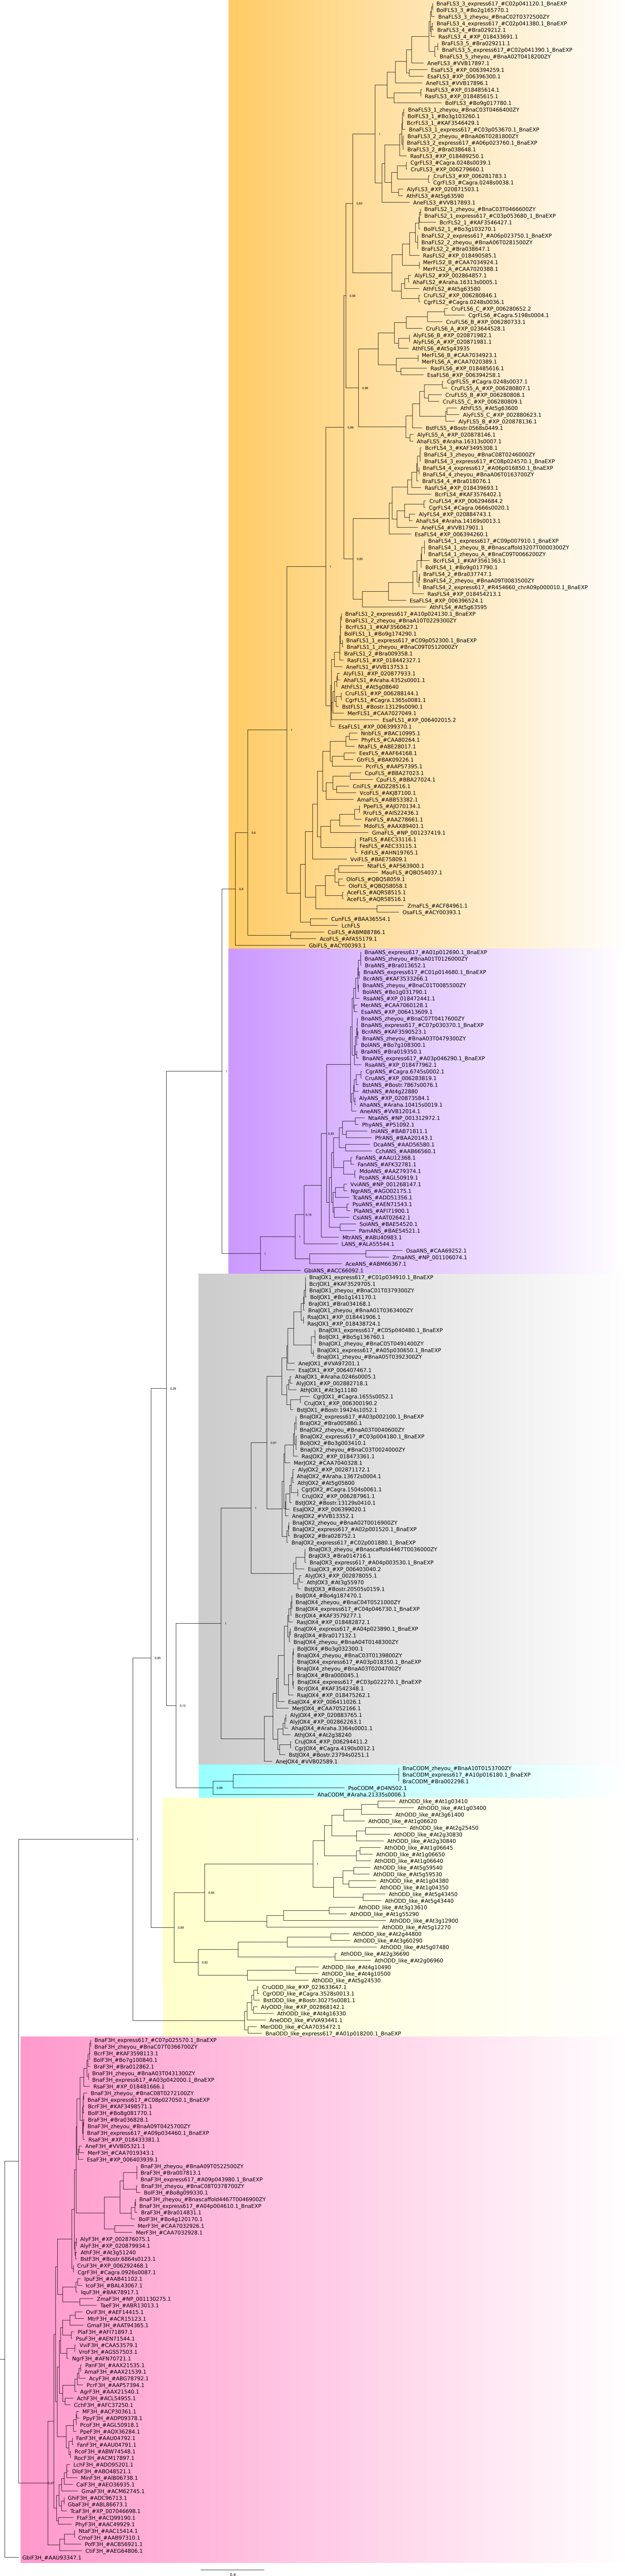

Supplement: Supplementary file [file media-12.pdf]
